# Supplementary material
Source: publisher figshare collection journal article supplement (https://springernature.figshare.com/articles/dataset/_/23578995)
Supplement: Supplementary file 1 [file 1]

## Sheet: trap_location
20220729
BG	Control	Release	Buffer	HLA	Control	Release	Buffer
	6	2	1		6	2	1
	7	3	10		7	3	4
	8	4	11		8		5
	9	5	12		9		11
	13		14		10
	15				12
20220729	Control		Release		Buffer
	BG	HLA	BG	HLA	BG	HLA
	6	6	2,3	2	1	1
	7	7, 8	4,5	3	14	11
	8	9			11	4,5
	13	10
	15	12
20220719	ovitrap
	release	control	buffer
	2-1	8-1-1(811)	1-1
	2-2	8-2-1(8-2)	1-2
	2-4		1-3
	2-5	5-1-1(511)	4-1
	2-6	5-2-1(521)	4-2
	2-7	5-3-1(531)	4-3
	2-8	5-1	4-4				1st release	2021-08-13		release area	trap 2-5
	2-9	5-2	4-5				End release	2021-11-30		control area	trap 1, 6-15
	3-1	A5-3	4-6				only males collected in trap 2 to 5 are selected for qPCR detection
	3-2	5-4	4-7
	3-3	5-5	4-8
	3-4	5-6	4-9
	3-5	5-7	6-1-1(611)
	3-6	5-8	6-2-1(621)
	A-1	5-9	6-3-1(631)
	A-2	5-10	6-4
	A-3	5-13A	6-5
	NO=17	9-2	6-6
		9-3	6-7
		9-4	6-8
		9-6	6-9
		9-7	6-10
		4-8	6-11
		4-9	6-13
		11-1	6-14
		11-2	6-15
		11-3	6-16
		11-4	6-17
		11-5	7-1
		11-6	7-2
		11-7	7-1-1(711)
		10-1	7-2-1(721)
		10-2	7-3-1(731)
		10-3	no.=33
		10-4
		10-5
		10-6
		10-7
		10-8
		9-1
		9-5
		no.=40
						8-1
						8-2
						8-3
						9-1
						9-2
						9-3
						9-4
						9-5
						9-6
						9-7
						9-8
						A5-3
						2-10
						6-1
						6-2

## Sheet: ovitraps
Block	Date	trap_id	eggs	hatch_larvae
Release	2021-03-08	2-1	0	0
Release	2021-03-08	2-2	0	0
Release	2021-03-08	2-4	0	0
Release	2021-03-08	2-5	0	0
Release	2021-03-08	2-6	38	37
Release	2021-03-08	2-7	24	23
Release	2021-03-08	2-8	71	62
Release	2021-03-08	2-9	0	0
Release	2021-03-08	3-1	40	40
Release	2021-03-08	3-2	0	0
Release	2021-03-08	3-3	75	75
Release	2021-03-08	3-4	0	0
Release	2021-03-08	3-5	32	38
Release	2021-03-08	3-6	0	0
Control	2021-03-08	A5-3	0	0
Control	2021-03-08	5-10	0	0
Control	2021-03-08	5-13	0	0
Control	2021-03-08	5-1	0	0
Control	2021-03-08	5-2	0	0
Control	2021-03-08	5-4	0	0
Control	2021-03-08	5-5	0	0
Control	2021-03-08	5-7	0	0
Control	2021-03-08	5-9	0	0
Control	2021-03-08	511	0	0
Control	2021-03-08	521	0	0
Control	2021-03-08	5-8	114	81
Control	2021-03-08	5-6	33	31
Control	2021-03-08	531	11	10
Control	2021-03-08	8-2	36	29
Control	2021-03-08	8-1	0	0
Control	2021-03-08	10-1	73	73
Control	2021-03-08	10-2	87	85
Control	2021-03-08	10-3	41	81
Control	2021-03-08	10-4	93	56
Control	2021-03-08	10-8	354	129
Control	2021-03-08	10-5	0	0
Control	2021-03-08	10-6	0	0
Control	2021-03-08	10-7	0	0
Control	2021-03-08	11-3	220	64
Control	2021-03-08	11-4	153	31
Control	2021-03-08	11-7	185	49
Control	2021-03-08	11-1	0	0
Control	2021-03-08	11-2	0	0
Control	2021-03-08	11-5	0	0
Control	2021-03-08	11-6	0	0
Control	2021-03-08	9-1	0	0
Control	2021-03-08	9-5	0	0
Control	2021-03-08	9-2	0	0
Control	2021-03-08	9-3	0	0
Control	2021-03-08	9-4	0	0
Control	2021-03-08	9-6	0	0
Control	2021-03-08	9-7	51	37
Control	2021-03-08	4-8	0	0
Control	2021-03-08	4-9	0	0
Buffer	2021-03-08	1-1	24	24
Buffer	2021-03-08	1-2	0	0
Buffer	2021-03-08	1-3	0	0
Buffer	2021-03-08	4-1	0	0
Buffer	2021-03-08	4-2	0	0
Buffer	2021-03-08	4-3	0	0
Buffer	2021-03-08	4-4	0	0
Buffer	2021-03-08	4-5	0	0
Buffer	2021-03-08	4-6	0	0
Buffer	2021-03-08	4-7	0	0
Buffer	2021-03-08	4-8	0	0
Buffer	2021-03-08	4-9	0	0
Buffer	2021-03-08	6-4	84	48
Buffer	2021-03-08	6-5	0	0
Buffer	2021-03-08	6-6	54	41
Buffer	2021-03-08	6-7	74	16
Buffer	2021-03-08	6-8	101	95
Buffer	2021-03-08	6-9	127	114
Buffer	2021-03-08	6-10	0	3
Buffer	2021-03-08	6-11	0	0
Buffer	2021-03-08	6-13	0	0
Buffer	2021-03-08	6-14	0	0
Buffer	2021-03-08	6-15	0	0
Buffer	2021-03-08	6-16	37	33
Buffer	2021-03-08	6-17	0	0
Buffer	2021-03-08	7-1	43	50
Buffer	2021-03-08	7-2	167	159
Release	2021-03-22	2-1	0	0
Release	2021-03-22	2-2	0	0
Release	2021-03-22	2-4	0	0
Release	2021-03-22	2-5	0	0
Release	2021-03-22	2-6	0	0
Release	2021-03-22	2-7	28	43
Release	2021-03-22	2-8	113	60
Release	2021-03-22	2-9	0	0
Release	2021-03-22	3-1	0	0
Release	2021-03-22	3-2	0	0
Release	2021-03-22	3-3	0	0
Release	2021-03-22	3-4	0	0
Release	2021-03-22	3-5	142	65
Release	2021-03-22	3-6	0	0
Control	2021-03-22	A5-3	0	0
Control	2021-03-22	5-10	0	0
Control	2021-03-22	5-13	0	0
Control	2021-03-22	5-1	105	47
Control	2021-03-22	5-2	0	0
Control	2021-03-22	5-4	0	0
Control	2021-03-22	5-5	56	60
Control	2021-03-22	5-7	0	0
Control	2021-03-22	5-9	0	0
Control	2021-03-22	511	41	21
Control	2021-03-22	521	0	0
Control	2021-03-22	5-8	58	46
Control	2021-03-22	5-6	90	41
Control	2021-03-22	531	0	0
Control	2021-03-22	8-2	118	65
Control	2021-03-22	8-1	0	0
Control	2021-03-22	10-1	28	34
Control	2021-03-22	10-2	0	0
Control	2021-03-22	10-3	0	0
Control	2021-03-22	10-4	57	69
Control	2021-03-22	10-8	281	91
Control	2021-03-22	10-5	0	0
Control	2021-03-22	10-6	97	67
Control	2021-03-22	10-7	0	0
Control	2021-03-22	11-3	115	84
Control	2021-03-22	11-4	0	0
Control	2021-03-22	11-7	0	0
Control	2021-03-22	11-1	0	0
Control	2021-03-22	11-2	0	0
Control	2021-03-22	11-5	0	0
Control	2021-03-22	11-6	73	80
Control	2021-03-22	9-1	77	40
Control	2021-03-22	9-5	0	0
Control	2021-03-22	9-2	0	0
Control	2021-03-22	9-3	0	0
Control	2021-03-22	9-4	45	52
Control	2021-03-22	9-6	0	0
Control	2021-03-22	9-7	0	0
Control	2021-03-22	4-8	0	0
Control	2021-03-22	4-9	0	0
Buffer	2021-03-22	1-1	46	43
Buffer	2021-03-22	1-2	0	0
Buffer	2021-03-22	1-3	0	0
Buffer	2021-03-22	4-1	0	0
Buffer	2021-03-22	4-2	103	54
Buffer	2021-03-22	4-3	0	0
Buffer	2021-03-22	4-4	0	0
Buffer	2021-03-22	4-5	0	0
Buffer	2021-03-22	4-6	21	16
Buffer	2021-03-22	4-7	8	86
Buffer	2021-03-22	4-8	0	0
Buffer	2021-03-22	4-9	0	0
Buffer	2021-03-22	6-4	69	58
Buffer	2021-03-22	6-5	315	139
Buffer	2021-03-22	6-6	0	0
Buffer	2021-03-22	6-7	27	27
Buffer	2021-03-22	6-8	72	57
Buffer	2021-03-22	6-9	23	13
Buffer	2021-03-22	6-10	58	26
Buffer	2021-03-22	6-11	0	0
Buffer	2021-03-22	6-13	56	50
Buffer	2021-03-22	6-14	161	128
Buffer	2021-03-22	6-15	46	48
Buffer	2021-03-22	6-16	0	0
Buffer	2021-03-22	6-17	41	20
Buffer	2021-03-22	7-1	59	50
Buffer	2021-03-22	7-2	182	102
Release	2021-04-20	2-1	26	52
Release	2021-04-20	2-2	10	26
Release	2021-04-20	2-4	59	40
Release	2021-04-20	2-5	38	0
Release	2021-04-20	2-6	37	79
Release	2021-04-20	2-7	102	50
Release	2021-04-20	2-8	115	98
Release	2021-04-20	2-9	17	21
Release	2021-04-20	3-1	105	82
Release	2021-04-20	3-2	0	0
Release	2021-04-20	3-3	742	0
Release	2021-04-20	3-4	82	71
Release	2021-04-20	3-5	138	112
Release	2021-04-20	3-6	0	0
Release	2021-04-20	A-3	30	28
Control	2021-04-20	A5-3	0	0
Control	2021-04-20	5-10	236	23
Control	2021-04-20	5-13	82	95
Control	2021-04-20	5-1	48	61
Control	2021-04-20	5-2	13	17
Control	2021-04-20	5-4	59	35
Control	2021-04-20	5-5	147	47
Control	2021-04-20	5-7	0	0
Control	2021-04-20	5-9	0	0
Control	2021-04-20	511	219	153
Control	2021-04-20	521	0	0
Control	2021-04-20	5-8	169	64
Control	2021-04-20	5-6	68	73
Control	2021-04-20	531	1165	91
Control	2021-04-20	8-2	91	77
Control	2021-04-20	8-1	20	83
Control	2021-04-20	10-1	0	0
Control	2021-04-20	10-2	396	45
Control	2021-04-20	10-3	28	47
Control	2021-04-20	10-4	230	25
Control	2021-04-20	10-8	23	36
Control	2021-04-20	10-5	307	59
Control	2021-04-20	10-6	74	61
Control	2021-04-20	10-7	287	126
Control	2021-04-20	11-3	114	60
Control	2021-04-20	11-4	62	30
Control	2021-04-20	11-7	175	108
Control	2021-04-20	11-1	94	36
Control	2021-04-20	11-2	165	43
Control	2021-04-20	11-5	70	55
Control	2021-04-20	11-6	54	39
Control	2021-04-20	9-1	455	81
Control	2021-04-20	9-5	25	31
Control	2021-04-20	9-2	222	57
Control	2021-04-20	9-3	0	0
Control	2021-04-20	9-4	0	4
Control	2021-04-20	9-6	41	48
Control	2021-04-20	9-7	110	28
Control	2021-04-20	4-8	81	68
Control	2021-04-20	4-9	0	0
Buffer	2021-04-20	1-1	0	0
Buffer	2021-04-20	1-2	0	0
Buffer	2021-04-20	1-3	0	0
Buffer	2021-04-20	4-1	94	43
Buffer	2021-04-20	4-2	0	0
Buffer	2021-04-20	4-3	63	68
Buffer	2021-04-20	4-4	41	35
Buffer	2021-04-20	4-5	368	73
Buffer	2021-04-20	4-6	170	60
Buffer	2021-04-20	4-7	178	69
Buffer	2021-04-20	4-8	81	68
Buffer	2021-04-20	4-9	0	0
Buffer	2021-04-20	6-1-1(611)	137	73
Buffer	2021-04-20	6-2-1(621)	NA	NA
Buffer	2021-04-20	6-3-1(631)	69	49
Buffer	2021-04-20	6-4	157	115
Buffer	2021-04-20	6-5	0	0
Buffer	2021-04-20	6-6	70	43
Buffer	2021-04-20	6-7	100	65
Buffer	2021-04-20	6-8	148	59
Buffer	2021-04-20	6-9	156	116
Buffer	2021-04-20	6-10	198	79
Buffer	2021-04-20	6-11	21	32
Buffer	2021-04-20	6-13	0	0
Buffer	2021-04-20	6-14	0	0
Buffer	2021-04-20	6-15	102	23
Buffer	2021-04-20	6-16	270	54
Buffer	2021-04-20	6-17	42	78
Buffer	2021-04-20	7-1	22	49
Buffer	2021-04-20	7-2	470	39
Buffer	2021-04-20	7-1-1(711)	NA	NA
Buffer	2021-04-20	7-2-1(721)	NA	NA
Buffer	2021-04-20	7-3-1(731)	NA	NA
Release	2021-05-05	2-1	237	52
Release	2021-05-05	2-2	148	21
Release	2021-05-05	2-4	299	84
Release	2021-05-05	2-5	0	112
Release	2021-05-05	2-6	249	42
Release	2021-05-05	2-7	346	54
Release	2021-05-05	2-8	0	66
Release	2021-05-05	2-9	149	57
Release	2021-05-05	3-1	452	92
Release	2021-05-05	3-2	0	0
Release	2021-05-05	3-3	1183	66
Release	2021-05-05	3-4	47	33
Release	2021-05-05	3-5	26	38
Release	2021-05-05	3-6	50	34
Release	2021-05-05	A-3	0	0
Release	2021-05-05	A-1	50	31
Control	2021-05-05	A5-3	0	0
Control	2021-05-05	5-10	71	41
Control	2021-05-05	5-13	73	88
Control	2021-05-05	5-1	7	0
Control	2021-05-05	5-2	0	0
Control	2021-05-05	5-4	491	57
Control	2021-05-05	5-5	237	46
Control	2021-05-05	5-7	0	0
Control	2021-05-05	5-9	78	44
Control	2021-05-05	511	385	41
Control	2021-05-05	521	0	0
Control	2021-05-05	5-8	244	18
Control	2021-05-05	5-6	349	43
Control	2021-05-05	531	438	50
Control	2021-05-05	8-2	216	86
Control	2021-05-05	8-1	0	0
Control	2021-05-05	10-1	189	40
Control	2021-05-05	10-2	160	94
Control	2021-05-05	10-3	200	102
Control	2021-05-05	10-4	37	42
Control	2021-05-05	10-8	896	79
Control	2021-05-05	10-5	397	51
Control	2021-05-05	10-6	50	28
Control	2021-05-05	10-7	120	77
Control	2021-05-05	11-3	89	54
Control	2021-05-05	11-4	121	62
Control	2021-05-05	11-7	769	57
Control	2021-05-05	11-1	19	16
Control	2021-05-05	11-2	116	55
Control	2021-05-05	11-5	93	44
Control	2021-05-05	11-6	154	73
Control	2021-05-05	9-1	0	0
Control	2021-05-05	9-5	85	28
Control	2021-05-05	9-2	106	37
Control	2021-05-05	9-3	99	63
Control	2021-05-05	9-4	0	0
Control	2021-05-05	9-6	66	24
Control	2021-05-05	9-7	0	0
Control	2021-05-05	4-8	164	0
Control	2021-05-05	4-9	102	32
Buffer	2021-05-05	1-1	0	0
Buffer	2021-05-05	1-2	0	0
Buffer	2021-05-05	1-3	0	0
Buffer	2021-05-05	4-1	147	63
Buffer	2021-05-05	4-2	257	76
Buffer	2021-05-05	4-3	132	53
Buffer	2021-05-05	4-4	0	0
Buffer	2021-05-05	4-5	146	88
Buffer	2021-05-05	4-6	156	108
Buffer	2021-05-05	4-7	65	61
Buffer	2021-05-05	4-8	164	0
Buffer	2021-05-05	4-9	102	32
Buffer	2021-05-05	6-1-1(611)	211	59
Buffer	2021-05-05	6-2-1(621)	0	0
Buffer	2021-05-05	6-3-1(631)	65	46
Buffer	2021-05-05	6-4	72	61
Buffer	2021-05-05	6-5	146	89
Buffer	2021-05-05	6-6	179	49
Buffer	2021-05-05	6-7	185	76
Buffer	2021-05-05	6-8	410	48
Buffer	2021-05-05	6-9	157	37
Buffer	2021-05-05	6-10	286	37
Buffer	2021-05-05	6-11	208	69
Buffer	2021-05-05	6-13	85	78
Buffer	2021-05-05	6-14	77	61
Buffer	2021-05-05	6-15	111	61
Buffer	2021-05-05	6-16	321	222
Buffer	2021-05-05	6-17	0	0
Buffer	2021-05-05	7-1	84	62
Buffer	2021-05-05	7-2	274	64
Buffer	2021-05-05	7-1-1(711)	132	86
Buffer	2021-05-05	7-2-1(721)	89	103
Buffer	2021-05-05	7-3-1(731)	NA	NA
Release	2021-05-18	2-1	0	0
Release	2021-05-18	2-2	114	54
Release	2021-05-18	2-4	0	0
Release	2021-05-18	2-5	0	0
Release	2021-05-18	2-6	73	40
Release	2021-05-18	2-7	66	34
Release	2021-05-18	2-8	120	74
Release	2021-05-18	2-9	95	63
Release	2021-05-18	3-1	87	47
Release	2021-05-18	3-2	0	37
Release	2021-05-18	3-3	614	142
Release	2021-05-18	3-4	626	43
Release	2021-05-18	3-5	0	0
Release	2021-05-18	3-6	0	0
Release	2021-05-18	A-3	16	3
Release	2021-05-18	A-1	47	32
Release	2021-05-18	A-2	129	94
Control	2021-05-18	A5-3	0	0
Control	2021-05-18	5-10	195	38
Control	2021-05-18	5-13	0	0
Control	2021-05-18	5-1	175	68
Control	2021-05-18	5-2	27	6
Control	2021-05-18	5-4	0	0
Control	2021-05-18	5-5	77	93
Control	2021-05-18	5-7	34	28
Control	2021-05-18	5-9	185	114
Control	2021-05-18	511	0	0
Control	2021-05-18	521	0	0
Control	2021-05-18	5-8	349	51
Control	2021-05-18	5-6	119	59
Control	2021-05-18	531	376	18
Control	2021-05-18	8-2	0	0
Control	2021-05-18	8-1	24	24
Control	2021-05-18	10-1	58	1
Control	2021-05-18	10-2	87	59
Control	2021-05-18	10-3	68	98
Control	2021-05-18	10-4	85	61
Control	2021-05-18	10-8	2441	88
Control	2021-05-18	10-5	462	45
Control	2021-05-18	10-6	85	71
Control	2021-05-18	10-7	398	114
Control	2021-05-18	11-3	0	0
Control	2021-05-18	11-4	32	40
Control	2021-05-18	11-7	130	108
Control	2021-05-18	11-1	56	12
Control	2021-05-18	11-2	152	81
Control	2021-05-18	11-5	258	23
Control	2021-05-18	11-6	453	59
Control	2021-05-18	9-1	189	75
Control	2021-05-18	9-5	162	64
Control	2021-05-18	9-2	147	26
Control	2021-05-18	9-3	0	0
Control	2021-05-18	9-4	53	51
Control	2021-05-18	9-6	0	0
Control	2021-05-18	9-7	166	4
Control	2021-05-18	4-8	130	103
Control	2021-05-18	4-9	71	48
Buffer	2021-05-18	1-1	0	0
Buffer	2021-05-18	1-2	0	0
Buffer	2021-05-18	1-3	0	0
Buffer	2021-05-18	4-1	133	0
Buffer	2021-05-18	4-2	0	0
Buffer	2021-05-18	4-3	35	23
Buffer	2021-05-18	4-4	0	0
Buffer	2021-05-18	4-5	51	28
Buffer	2021-05-18	4-6	288	102
Buffer	2021-05-18	4-7	45	63
Buffer	2021-05-18	4-8	130	103
Buffer	2021-05-18	4-9	71	48
Buffer	2021-05-18	6-1-1(611)	50	34
Buffer	2021-05-18	6-2-1(621)	NA	NA
Buffer	2021-05-18	6-3-1(631)	519	18
Buffer	2021-05-18	6-4	0	0
Buffer	2021-05-18	6-5	28	18
Buffer	2021-05-18	6-6	0	0
Buffer	2021-05-18	6-7	124	38
Buffer	2021-05-18	6-8	170	26
Buffer	2021-05-18	6-9	0	0
Buffer	2021-05-18	6-10	186	29
Buffer	2021-05-18	6-11	NA	NA
Buffer	2021-05-18	6-13	59	73
Buffer	2021-05-18	6-14	205	44
Buffer	2021-05-18	6-15	0	0
Buffer	2021-05-18	6-16	NA	NA
Buffer	2021-05-18	6-17	0	0
Buffer	2021-05-18	7-1	203	49
Buffer	2021-05-18	7-2	62	49
Buffer	2021-05-18	7-1-1(711)	NA	NA
Buffer	2021-05-18	7-2-1(721)	NA	NA
Buffer	2021-05-18	7-3-1(731)	NA	NA
Release	2021-06-02	2-1	10	5
Release	2021-06-02	2-2	0	0
Release	2021-06-02	2-4	0	0
Release	2021-06-02	2-5	0	0
Release	2021-06-02	2-6	119	85
Release	2021-06-02	2-7	0	0
Release	2021-06-02	2-8	0	0
Release	2021-06-02	2-9	1	6
Release	2021-06-02	3-1	0	0
Release	2021-06-02	3-2	0	42
Release	2021-06-02	3-3	0	0
Release	2021-06-02	3-4	827	14
Release	2021-06-02	3-5	1213	33
Release	2021-06-02	3-6	0	0
Release	2021-06-02	A-3	3	0
Release	2021-06-02	A-1	39	16
Release	2021-06-02	A-2	279	55
Control	2021-06-02	A5-3	150	73
Control	2021-06-02	5-10	285	153
Control	2021-06-02	5-13	0	0
Control	2021-06-02	5-1	0	0
Control	2021-06-02	5-2	77	68
Control	2021-06-02	5-4	0	0
Control	2021-06-02	5-5	345	17
Control	2021-06-02	5-7	0	0
Control	2021-06-02	5-9	211	92
Control	2021-06-02	511	249	59
Control	2021-06-02	521	0	0
Control	2021-06-02	5-8	0	0
Control	2021-06-02	5-6	0	0
Control	2021-06-02	531	402	34
Control	2021-06-02	8-2	83	40
Control	2021-06-02	8-1	0	0
Control	2021-06-02	10-1	0	0
Control	2021-06-02	10-2	0	0
Control	2021-06-02	10-3	0	0
Control	2021-06-02	10-4	0	0
Control	2021-06-02	10-8	0	0
Control	2021-06-02	10-5	638	78
Control	2021-06-02	10-6	208	70
Control	2021-06-02	10-7	0	127
Control	2021-06-02	11-3	0	0
Control	2021-06-02	11-4	75	9
Control	2021-06-02	11-7	0	0
Control	2021-06-02	11-1	0	1
Control	2021-06-02	11-2	198	78
Control	2021-06-02	11-5	309	18
Control	2021-06-02	11-6	314	12
Control	2021-06-02	9-1	76	65
Control	2021-06-02	9-5	0	0
Control	2021-06-02	9-2	82	72
Control	2021-06-02	9-3	247	81
Control	2021-06-02	9-4	0	0
Control	2021-06-02	9-6	0	0
Control	2021-06-02	9-7	0	0
Control	2021-06-02	4-8	0	0
Control	2021-06-02	4-9	187	31
Buffer	2021-06-02	1-1	0	0
Buffer	2021-06-02	1-2	0	0
Buffer	2021-06-02	1-3	0	0
Buffer	2021-06-02	4-1	0	0
Buffer	2021-06-02	4-2	0	0
Buffer	2021-06-02	4-3	33	23
Buffer	2021-06-02	4-4	196	109
Buffer	2021-06-02	4-5	108	53
Buffer	2021-06-02	4-6	17	0
Buffer	2021-06-02	4-7	0	0
Buffer	2021-06-02	4-8	0	0
Buffer	2021-06-02	4-9	187	31
Buffer	2021-06-02	6-1-1(611)	NA	NA
Buffer	2021-06-02	6-2-1(621)	127	73
Buffer	2021-06-02	6-3-1(631)	NA	NA
Buffer	2021-06-02	6-4	0	0
Buffer	2021-06-02	6-5	216	28
Buffer	2021-06-02	6-6	95	536
Buffer	2021-06-02	6-7	407	69
Buffer	2021-06-02	6-8	133	76
Buffer	2021-06-02	6-9	148	66
Buffer	2021-06-02	6-10	413	178
Buffer	2021-06-02	6-11	55	33
Buffer	2021-06-02	6-13	0	0
Buffer	2021-06-02	6-14	51	54
Buffer	2021-06-02	6-15	320	85
Buffer	2021-06-02	6-16	0	0
Buffer	2021-06-02	6-17	0	0
Buffer	2021-06-02	7-1	305	56
Buffer	2021-06-02	7-2	334	61
Buffer	2021-06-02	7-1-1(711)	NA	NA
Buffer	2021-06-02	7-2-1(721)	546	37
Buffer	2021-06-02	7-3-1(731)	NA	NA
Release	2021-06-16	2-1	0	0
Release	2021-06-16	2-2	4	6
Release	2021-06-16	2-4	0	49
Release	2021-06-16	2-5	0	0
Release	2021-06-16	2-6	0	35
Release	2021-06-16	2-7	52	21
Release	2021-06-16	2-8	0	0
Release	2021-06-16	2-9	0	0
Release	2021-06-16	3-1	0	0
Release	2021-06-16	3-2	0	0
Release	2021-06-16	3-3	367	29
Release	2021-06-16	3-4	0	0
Release	2021-06-16	3-5	23	16
Release	2021-06-16	3-6	46	31
Release	2021-06-16	A-3	16	43
Release	2021-06-16	A-1	0	0
Release	2021-06-16	A-2	0	0
Control	2021-06-16	A5-3	0	9
Control	2021-06-16	5-10	0	0
Control	2021-06-16	5-13	128	68
Control	2021-06-16	5-1	0	0
Control	2021-06-16	5-2	20	38
Control	2021-06-16	5-4	438	27
Control	2021-06-16	5-5	0	0
Control	2021-06-16	5-7	0	0
Control	2021-06-16	5-9	18	25
Control	2021-06-16	511	0	0
Control	2021-06-16	521	8	23
Control	2021-06-16	5-8	64	98
Control	2021-06-16	5-6	66	36
Control	2021-06-16	531	27	24
Control	2021-06-16	8-2	0	0
Control	2021-06-16	8-1	0	0
Control	2021-06-16	10-1	101	161
Control	2021-06-16	10-2	171	61
Control	2021-06-16	10-3	14	77
Control	2021-06-16	10-4	109	55
Control	2021-06-16	10-8	0	0
Control	2021-06-16	10-5	24	11
Control	2021-06-16	10-6	3	5
Control	2021-06-16	10-7	59	77
Control	2021-06-16	11-3	14	4
Control	2021-06-16	11-4	112	39
Control	2021-06-16	11-7	0	0
Control	2021-06-16	11-1	25	44
Control	2021-06-16	11-2	31	46
Control	2021-06-16	11-5	5	29
Control	2021-06-16	11-6	265	117
Control	2021-06-16	9-1	136	78
Control	2021-06-16	9-5	0	0
Control	2021-06-16	9-2	26	11
Control	2021-06-16	9-3	7	0
Control	2021-06-16	9-4	0	0
Control	2021-06-16	9-6	0	0
Control	2021-06-16	9-7	62	107
Control	2021-06-16	4-8	9	7
Control	2021-06-16	4-9	0	0
Buffer	2021-06-16	1-1	0	0
Buffer	2021-06-16	1-2	0	0
Buffer	2021-06-16	1-3	0	0
Buffer	2021-06-16	4-1	0	0
Buffer	2021-06-16	4-2	72	46
Buffer	2021-06-16	4-3	6	11
Buffer	2021-06-16	4-4	178	67
Buffer	2021-06-16	4-5	24	55
Buffer	2021-06-16	4-6	212	60
Buffer	2021-06-16	4-7	11	20
Buffer	2021-06-16	4-8	9	7
Buffer	2021-06-16	4-9	0	0
Buffer	2021-06-16	6-1-1(611)	NA	NA
Buffer	2021-06-16	6-2-1(621)	35	8
Buffer	2021-06-16	6-3-1(631)	NA	NA
Buffer	2021-06-16	6-4	70	43
Buffer	2021-06-16	6-5	91	55
Buffer	2021-06-16	6-6	5	27
Buffer	2021-06-16	6-7	0	0
Buffer	2021-06-16	6-8	13	54
Buffer	2021-06-16	6-9	70	47
Buffer	2021-06-16	6-10	159	45
Buffer	2021-06-16	6-11	0	0
Buffer	2021-06-16	6-13	0	0
Buffer	2021-06-16	6-14	94	47
Buffer	2021-06-16	6-15	427	72
Buffer	2021-06-16	6-16	95	45
Buffer	2021-06-16	6-17	0	0
Buffer	2021-06-16	7-1	91	70
Buffer	2021-06-16	7-2	69	55
Buffer	2021-06-16	7-1-1(711)	81	57
Buffer	2021-06-16	7-2-1(721)	0	0
Buffer	2021-06-16	7-3-1(731)	0	0
Release	2021-07-12	2-1	27	41
Release	2021-07-12	2-2	391	85
Release	2021-07-12	2-4	0	0
Release	2021-07-12	2-5	75	15
Release	2021-07-12	2-6	13	0
Release	2021-07-12	2-7	48	45
Release	2021-07-12	2-8	0	0
Release	2021-07-12	2-9	0	0
Release	2021-07-12	3-1	101	0
Release	2021-07-12	3-2	31	27
Release	2021-07-12	3-3	278	30
Release	2021-07-12	3-4	96	28
Release	2021-07-12	3-5	0	0
Release	2021-07-12	3-6	0	0
Release	2021-07-12	A-3	0	0
Release	2021-07-12	A-1	131	99
Release	2021-07-12	A-2	0	0
Control	2021-07-12	A5-3	117	95
Control	2021-07-12	5-10	1412	85
Control	2021-07-12	5-13	0	0
Control	2021-07-12	5-1	0	0
Control	2021-07-12	5-2	295	76
Control	2021-07-12	5-4	303	81
Control	2021-07-12	5-5	320	29
Control	2021-07-12	5-7	51	35
Control	2021-07-12	5-9	187	162
Control	2021-07-12	511	37	30
Control	2021-07-12	521	64	60
Control	2021-07-12	5-8	64	165
Control	2021-07-12	5-6	181	102
Control	2021-07-12	531	159	80
Control	2021-07-12	8-2	41	53
Control	2021-07-12	8-1	33	16
Control	2021-07-12	10-1	0	0
Control	2021-07-12	10-2	141	46
Control	2021-07-12	10-3	125	87
Control	2021-07-12	10-4	156	89
Control	2021-07-12	10-8	0	0
Control	2021-07-12	10-5	158	104
Control	2021-07-12	10-6	98	36
Control	2021-07-12	10-7	153	43
Control	2021-07-12	11-3	239	52
Control	2021-07-12	11-4	811	42
Control	2021-07-12	11-7	40	32
Control	2021-07-12	11-1	12	11
Control	2021-07-12	11-2	40	37
Control	2021-07-12	11-5	261	96
Control	2021-07-12	11-6	417	108
Control	2021-07-12	9-1	0	0
Control	2021-07-12	9-5	204	50
Control	2021-07-12	9-2	111	100
Control	2021-07-12	9-3	0	0
Control	2021-07-12	9-4	0	0
Control	2021-07-12	9-6	35	25
Control	2021-07-12	9-7	0	0
Control	2021-07-12	4-8	0	0
Control	2021-07-12	4-9	0	0
Buffer	2021-07-12	1-1	0	0
Buffer	2021-07-12	1-2	0	0
Buffer	2021-07-12	1-3	0	0
Buffer	2021-07-12	4-1	249	17
Buffer	2021-07-12	4-2	124	99
Buffer	2021-07-12	4-3	0	0
Buffer	2021-07-12	4-4	570	83
Buffer	2021-07-12	4-5	NA	NA
Buffer	2021-07-12	4-6	166	56
Buffer	2021-07-12	4-7	0	0
Buffer	2021-07-12	4-8	0	0
Buffer	2021-07-12	4-9	0	0
Buffer	2021-07-12	6-1-1(611)	249	66
Buffer	2021-07-12	6-2-1(621)	16	10
Buffer	2021-07-12	6-3-1(631)	101	24
Buffer	2021-07-12	6-4	27	14
Buffer	2021-07-12	6-5	28	0
Buffer	2021-07-12	6-6	0	0
Buffer	2021-07-12	6-7	73	50
Buffer	2021-07-12	6-8	216	75
Buffer	2021-07-12	6-9	27	13
Buffer	2021-07-12	6-10	128	60
Buffer	2021-07-12	6-11	61	43
Buffer	2021-07-12	6-13	35	14
Buffer	2021-07-12	6-14	128	92
Buffer	2021-07-12	6-15	0	0
Buffer	2021-07-12	6-16	163	81
Buffer	2021-07-12	6-17	0	0
Buffer	2021-07-12	7-1	871	96
Buffer	2021-07-12	7-2	62	34
Buffer	2021-07-12	7-1-1(711)	247	108
Buffer	2021-07-12	7-2-1(721)	122	101
Buffer	2021-07-12	7-3-1(731)	4	5
Release	2021-07-27	2-1	0	0
Release	2021-07-27	2-2	0	0
Release	2021-07-27	2-4	4	3
Release	2021-07-27	2-5	9	5
Release	2021-07-27	2-6	109	61
Release	2021-07-27	2-7	0	0
Release	2021-07-27	2-8	52	19
Release	2021-07-27	2-9	0	0
Release	2021-07-27	3-1	21	18
Release	2021-07-27	3-2	17	18
Release	2021-07-27	3-3	215	90
Release	2021-07-27	3-6	15	22
Release	2021-07-27	3-4	0	0
Release	2021-07-27	3-5	0	0
Release	2021-07-27	A-3	0	0
Release	2021-07-27	A-1	0	0
Release	2021-07-27	A-2	46	24
Control	2021-07-27	A5-3	0	0
Control	2021-07-27	5-10	20	18
Control	2021-07-27	5-13	0	0
Control	2021-07-27	5-1	0	45
Control	2021-07-27	5-2	317	56
Control	2021-07-27	5-4	21	18
Control	2021-07-27	5-5	38	36
Control	2021-07-27	5-7	0	0
Control	2021-07-27	5-9	95	58
Control	2021-07-27	511	62	46
Control	2021-07-27	521	4	3
Control	2021-07-27	5-8	17	12
Control	2021-07-27	5-6	128	58
Control	2021-07-27	531	254	63
Control	2021-07-27	8-2	118	74
Control	2021-07-27	8-1	7	1
Control	2021-07-27	10-1	7	3
Control	2021-07-27	10-2	0	0
Control	2021-07-27	10-3	42	24
Control	2021-07-27	10-4	9	8
Control	2021-07-27	10-8	98	51
Control	2021-07-27	10-5	13	95
Control	2021-07-27	10-6	92	23
Control	2021-07-27	10-7	23	13
Control	2021-07-27	11-3	57	3
Control	2021-07-27	11-4	0	0
Control	2021-07-27	11-7	0	0
Control	2021-07-27	11-1	310	78
Control	2021-07-27	11-2	85	33
Control	2021-07-27	11-5	67	64
Control	2021-07-27	11-6	95	47
Control	2021-07-27	9-1	0	0
Control	2021-07-27	9-5	21	8
Control	2021-07-27	9-2	0	0
Control	2021-07-27	9-3	0	0
Control	2021-07-27	9-4	0	0
Control	2021-07-27	9-6	16	8
Control	2021-07-27	9-7	0	0
Control	2021-07-27	4-8	33	30
Control	2021-07-27	4-9	28	16
Buffer	2021-07-27	1-1	0	0
Buffer	2021-07-27	1-2	0	0
Buffer	2021-07-27	1-3	0	0
Buffer	2021-07-27	4-1	4	3
Buffer	2021-07-27	4-2	37	25
Buffer	2021-07-27	4-3	0	0
Buffer	2021-07-27	4-4	42	9
Buffer	2021-07-27	4-5	0	0
Buffer	2021-07-27	4-6	103	88
Buffer	2021-07-27	4-7	141	133
Buffer	2021-07-27	4-8	33	30
Buffer	2021-07-27	4-9	28	16
Buffer	2021-07-27	6-1-1(611)	62	17
Buffer	2021-07-27	6-2-1(621)	NA	NA
Buffer	2021-07-27	6-3-1(631)	15	8
Buffer	2021-07-27	6-4	9	7
Buffer	2021-07-27	6-5	83	77
Buffer	2021-07-27	6-6	0	0
Buffer	2021-07-27	6-7	48	1
Buffer	2021-07-27	6-8	2	1
Buffer	2021-07-27	6-9	0	0
Buffer	2021-07-27	6-10	48	0
Buffer	2021-07-27	6-11	0	0
Buffer	2021-07-27	6-13	0	0
Buffer	2021-07-27	6-14	0	0
Buffer	2021-07-27	6-15	0	0
Buffer	2021-07-27	6-16	38	10
Buffer	2021-07-27	6-17	147	22
Buffer	2021-07-27	7-1	0	0
Buffer	2021-07-27	7-2	17	7
Buffer	2021-07-27	7-1-1(711)	121	50
Buffer	2021-07-27	7-2-1(721)	64	5
Buffer	2021-07-27	7-3-1(731)	54	29
Release	2021-08-12	2-1	104	69
Release	2021-08-12	2-2	35	32
Release	2021-08-12	2-4	33	23
Release	2021-08-12	2-5	180	85
Release	2021-08-12	2-6	0	0
Release	2021-08-12	2-7	31	7
Release	2021-08-12	2-8	88	46
Release	2021-08-12	2-9	0	0
Release	2021-08-12	3-1	48	18
Release	2021-08-12	3-2	0	0
Release	2021-08-12	3-3	180	202
Release	2021-08-12	3-4	90	172
Release	2021-08-12	3-5	0	0
Release	2021-08-12	3-6	72	98
Release	2021-08-12	A-3	26	9
Release	2021-08-12	A-1	35	14
Release	2021-08-12	A-2	0	0
Control	2021-08-12	A5-3	77	35
Control	2021-08-12	5-10	54	11
Control	2021-08-12	5-13	0	0
Control	2021-08-12	5-1	81	0
Control	2021-08-12	5-2	59	50
Control	2021-08-12	5-4	154	120
Control	2021-08-12	5-5	66	30
Control	2021-08-12	5-7	212	81
Control	2021-08-12	5-9	271	101
Control	2021-08-12	511	0	0
Control	2021-08-12	521	0	0
Control	2021-08-12	5-8	0	0
Control	2021-08-12	5-6	178	0
Control	2021-08-12	531	0	0
Control	2021-08-12	8-2	0	0
Control	2021-08-12	8-1	0	0
Control	2021-08-12	10-1	82	109
Control	2021-08-12	10-2	393	47
Control	2021-08-12	10-3	113	132
Control	2021-08-12	10-4	406	99
Control	2021-08-12	10-8	172	73
Control	2021-08-12	10-5	49	42
Control	2021-08-12	10-6	172	102
Control	2021-08-12	10-7	87	41
Control	2021-08-12	11-3	60	40
Control	2021-08-12	11-4	597	84
Control	2021-08-12	11-7	53	49
Control	2021-08-12	11-1	143	50
Control	2021-08-12	11-2	54	48
Control	2021-08-12	11-5	123	65
Control	2021-08-12	11-6	73	37
Control	2021-08-12	9-1	0	0
Control	2021-08-12	9-5	161	118
Control	2021-08-12	9-2	35	25
Control	2021-08-12	9-3	66	3
Control	2021-08-12	9-4	75	24
Control	2021-08-12	9-6	0	0
Control	2021-08-12	9-7	0	0
Control	2021-08-12	4-8	91	41
Control	2021-08-12	4-9	0	0
Buffer	2021-08-12	1-1	0	0
Buffer	2021-08-12	1-2	0	0
Buffer	2021-08-12	1-3	0	0
Buffer	2021-08-12	4-1	0	0
Buffer	2021-08-12	4-2	182	65
Buffer	2021-08-12	4-3	0	0
Buffer	2021-08-12	4-4	128	135
Buffer	2021-08-12	4-5	50	82
Buffer	2021-08-12	4-6	85	40
Buffer	2021-08-12	4-7	0	2
Buffer	2021-08-12	4-8	91	41
Buffer	2021-08-12	4-9	0	0
Buffer	2021-08-12	6-1-1(611)	NA	NA
Buffer	2021-08-12	6-2-1(621)	NA	NA
Buffer	2021-08-12	6-3-1(631)	NA	NA
Buffer	2021-08-12	6-4	0	0
Buffer	2021-08-12	6-5	0	0
Buffer	2021-08-12	6-6	0	0
Buffer	2021-08-12	6-7	0	0
Buffer	2021-08-12	6-8	0	0
Buffer	2021-08-12	6-9	0	0
Buffer	2021-08-12	6-10	43	27
Buffer	2021-08-12	6-11	94	69
Buffer	2021-08-12	6-13	42	9
Buffer	2021-08-12	6-14	49	15
Buffer	2021-08-12	6-15	37	28
Buffer	2021-08-12	6-16	121	84
Buffer	2021-08-12	6-17	10	82
Buffer	2021-08-12	7-1	154	102
Buffer	2021-08-12	7-2	47	0
Buffer	2021-08-12	7-1-1(711)	NA	NA
Buffer	2021-08-12	7-2-1(721)	NA	NA
Buffer	2021-08-12	7-3-1(731)	NA	NA
Release	2021-08-17	2-1	94	13
Release	2021-08-17	2-2	38	40
Release	2021-08-17	2-4	136	71
Release	2021-08-17	2-5	26	20
Release	2021-08-17	2-6	1	1
Release	2021-08-17	2-7	45	2
Release	2021-08-17	2-8	294	49
Release	2021-08-17	2-9	0	0
Release	2021-08-17	3-1	27	12
Release	2021-08-17	3-2	43	36
Release	2021-08-17	3-3	477	30
Release	2021-08-17	3-4	46	16
Release	2021-08-17	3-5	225	49
Release	2021-08-17	3-6	72	51
Release	2021-08-17	A3	0	2
Release	2021-08-17	A1	58	49
Release	2021-08-17	A2	0	0
Control	2021-08-17	A5-3	73	60
Control	2021-08-17	5-10	0	0
Control	2021-08-17	5-13	131	15
Control	2021-08-17	5-1	24	9
Control	2021-08-17	5-2	0	0
Control	2021-08-17	5-4	62	20
Control	2021-08-17	5-5	0	0
Control	2021-08-17	5-7	99	38
Control	2021-08-17	5-9	46	21
Control	2021-08-17	511	0	0
Control	2021-08-17	521	0	0
Control	2021-08-17	5-8	0	0
Control	2021-08-17	5-6	46	1
Control	2021-08-17	531	0	0
Control	2021-08-17	8-2	0	0
Control	2021-08-17	8-1	15	9
Control	2021-08-17	10-1	50	33
Control	2021-08-17	10-2	84	12
Control	2021-08-17	10-3	131	22
Control	2021-08-17	10-4	174	47
Control	2021-08-17	10-8	188	68
Control	2021-08-17	10-5	167	42
Control	2021-08-17	10-6	0	0
Control	2021-08-17	10-7	0	0
Control	2021-08-17	11-3	252	30
Control	2021-08-17	11-4	170	31
Control	2021-08-17	11-7	207	69
Control	2021-08-17	11-1	154	27
Control	2021-08-17	11-2	43	34
Control	2021-08-17	11-5	143	22
Control	2021-08-17	11-6	522	44
Control	2021-08-17	9-1	275	0
Control	2021-08-17	9-5	0	0
Control	2021-08-17	9-2	187	53
Control	2021-08-17	9-3	56	36
Control	2021-08-17	9-4	35	34
Control	2021-08-17	9-6	24	0
Control	2021-08-17	9-7	204	21
Control	2021-08-17	4-8	0	0
Control	2021-08-17	4-9	0	0
Buffer	2021-08-17	1-1	0	0
Buffer	2021-08-17	1-2	0	0
Buffer	2021-08-17	1-3	0	0
Buffer	2021-08-17	4-1	293	61
Buffer	2021-08-17	4-2	0	0
Buffer	2021-08-17	4-3	0	0
Buffer	2021-08-17	4-4	0	0
Buffer	2021-08-17	4-5	0	0
Buffer	2021-08-17	4-6	5	4
Buffer	2021-08-17	4-7	161	49
Buffer	2021-08-17	4-8	0	0
Buffer	2021-08-17	4-9	0	0
Buffer	2021-08-17	6-1-1(611)	0	0
Buffer	2021-08-17	6-2-1(621)	120	19
Buffer	2021-08-17	6-3-1(631)	0	0
Buffer	2021-08-17	6-4	199	55
Buffer	2021-08-17	6-5	0	1
Buffer	2021-08-17	6-6	97	39
Buffer	2021-08-17	6-7	52	11
Buffer	2021-08-17	6-8	72	32
Buffer	2021-08-17	6-9	165	30
Buffer	2021-08-17	6-10	144	24
Buffer	2021-08-17	6-11	0	0
Buffer	2021-08-17	6-13	0	0
Buffer	2021-08-17	6-14	0	0
Buffer	2021-08-17	6-15	29	19
Buffer	2021-08-17	6-16	22	16
Buffer	2021-08-17	6-17	121	17
Buffer	2021-08-17	7-1	52	32
Buffer	2021-08-17	7-2	8	24
Buffer	2021-08-17	7-1-1(711)	NA	NA
Buffer	2021-08-17	7-2-1(721)	NA	NA
Buffer	2021-08-17	7-3-1(731)	NA	NA
Release	2021-08-23	2-1	0	0
Release	2021-08-23	2-2	72	26
Release	2021-08-23	2-4	0	2
Release	2021-08-23	2-5	0	0
Release	2021-08-23	2-6	42	67
Release	2021-08-23	2-7	145	72
Release	2021-08-23	2-8	100	40
Release	2021-08-23	2-9	2	57
Release	2021-08-23	3-1	77	19
Release	2021-08-23	3-2	0	0
Release	2021-08-23	3-3	438	100
Release	2021-08-23	3-4	0	0
Release	2021-08-23	3-5	0	0
Release	2021-08-23	3-6	381	77
Release	2021-08-23	A-3	35	26
Release	2021-08-23	A-1	77	59
Release	2021-08-23	A-2	0	0
Control	2021-08-23	A5-3	36	31
Control	2021-08-23	5-10	93	65
Control	2021-08-23	5-13	19	23
Control	2021-08-23	5-1	78	56
Control	2021-08-23	5-2	1	21
Control	2021-08-23	5-4	87	58
Control	2021-08-23	5-5	38	77
Control	2021-08-23	5-7	0	0
Control	2021-08-23	5-9	1	0
Control	2021-08-23	511	0	6
Control	2021-08-23	521	0	0
Control	2021-08-23	5-8	203	87
Control	2021-08-23	5-6	10	3
Control	2021-08-23	531	63	34
Control	2021-08-23	8-2	82	98
Control	2021-08-23	8-1	122	45
Control	2021-08-23	10-1	0	0
Control	2021-08-23	10-2	412	44
Control	2021-08-23	10-3	382	59
Control	2021-08-23	10-4	32	21
Control	2021-08-23	10-8	127	114
Control	2021-08-23	10-5	253	137
Control	2021-08-23	10-6	0	0
Control	2021-08-23	10-7	41	2
Control	2021-08-23	11-3	285	2
Control	2021-08-23	11-4	325	29
Control	2021-08-23	11-7	464	21
Control	2021-08-23	11-1	161	88
Control	2021-08-23	11-2	95	13
Control	2021-08-23	11-5	33	70
Control	2021-08-23	11-6	54	84
Control	2021-08-23	9-1	64	38
Control	2021-08-23	9-5	202	85
Control	2021-08-23	9-2	0	4
Control	2021-08-23	9-3	204	52
Control	2021-08-23	9-4	0	0
Control	2021-08-23	9-6	433	71
Control	2021-08-23	9-7	210	51
Control	2021-08-23	4-8	0	0
Control	2021-08-23	4-9	85	69
Buffer	2021-08-23	1-1	NA	NA
Buffer	2021-08-23	1-2	0	0
Buffer	2021-08-23	1-3	0	0
Buffer	2021-08-23	4-1	99	0
Buffer	2021-08-23	4-2	26	20
Buffer	2021-08-23	4-3	0	3
Buffer	2021-08-23	4-4	0	0
Buffer	2021-08-23	4-5	14	13
Buffer	2021-08-23	4-6	111	13
Buffer	2021-08-23	4-7	0	0
Buffer	2021-08-23	4-8	0	0
Buffer	2021-08-23	4-9	85	69
Buffer	2021-08-23	6-1-1(611)	47	55
Buffer	2021-08-23	6-2-1(621)	NA	NA
Buffer	2021-08-23	6-3-1(631)	282	69
Buffer	2021-08-23	6-4	71	5
Buffer	2021-08-23	6-5	0	68
Buffer	2021-08-23	6-6	107	46
Buffer	2021-08-23	6-7	0	0
Buffer	2021-08-23	6-8	0	0
Buffer	2021-08-23	6-9	172	0
Buffer	2021-08-23	6-10	145	28
Buffer	2021-08-23	6-11	80	41
Buffer	2021-08-23	6-13	NA	NA
Buffer	2021-08-23	6-14	NA	NA
Buffer	2021-08-23	6-15	13	17
Buffer	2021-08-23	6-16	226	84
Buffer	2021-08-23	6-17	9	15
Buffer	2021-08-23	7-1	9	13
Buffer	2021-08-23	7-2	167	61
Buffer	2021-08-23	7-1-1(711)	101	39
Buffer	2021-08-23	7-2-1(721)	135	46
Buffer	2021-08-23	7-3-1(731)	158	69
Release	2021-09-06	2-1	37	27
Release	2021-09-06	2-2	24	41
Release	2021-09-06	2-4	88	67
Release	2021-09-06	2-5	10	2
Release	2021-09-06	2-6	58	11
Release	2021-09-06	2-7	0	0
Release	2021-09-06	2-8	9	0
Release	2021-09-06	2-9	2	0
Release	2021-09-06	3-1	118	18
Release	2021-09-06	3-2	2	0
Release	2021-09-06	3-3	153	64
Release	2021-09-06	3-4	6	17
Release	2021-09-06	3-5	10	8
Release	2021-09-06	3-6	60	17
Release	2021-09-06	A-3	0	0
Release	2021-09-06	A-1	17	16
Release	2021-09-06	A-2	33	10
Control	2021-09-06	A5-3	69	55
Control	2021-09-06	5-10	66	80
Control	2021-09-06	5-13	84	19
Control	2021-09-06	5-1	51	21
Control	2021-09-06	5-2	0	0
Control	2021-09-06	5-4	100	32
Control	2021-09-06	5-5	43	18
Control	2021-09-06	5-7	40	40
Control	2021-09-06	5-9	85	70
Control	2021-09-06	511	7	21
Control	2021-09-06	521	0	0
Control	2021-09-06	5-8	52	41
Control	2021-09-06	5-6	64	35
Control	2021-09-06	531	195	43
Control	2021-09-06	8-2	102	42
Control	2021-09-06	8-1	0	0
Control	2021-09-06	10-1	0	26
Control	2021-09-06	10-2	18	50
Control	2021-09-06	10-3	48	55
Control	2021-09-06	10-4	27	19
Control	2021-09-06	10-8	133	17
Control	2021-09-06	10-5	383	66
Control	2021-09-06	10-6	0	0
Control	2021-09-06	10-7	0	0
Control	2021-09-06	11-3	44	59
Control	2021-09-06	11-4	62	64
Control	2021-09-06	11-7	51	34
Control	2021-09-06	11-1	15	9
Control	2021-09-06	11-2	109	24
Control	2021-09-06	11-5	42	53
Control	2021-09-06	11-6	0	0
Control	2021-09-06	9-1	108	19
Control	2021-09-06	9-5	0	0
Control	2021-09-06	9-2	0	0
Control	2021-09-06	9-3	12	100
Control	2021-09-06	9-4	0	0
Control	2021-09-06	9-6	74	26
Control	2021-09-06	9-7	2	0
Control	2021-09-06	4-8	0	0
Control	2021-09-06	4-9	1	12
Buffer	2021-09-06	1-1	0	0
Buffer	2021-09-06	1-2	0	0
Buffer	2021-09-06	1-3	0	0
Buffer	2021-09-06	4-1	0	0
Buffer	2021-09-06	4-2	7	43
Buffer	2021-09-06	4-3	7	0
Buffer	2021-09-06	4-4	0	0
Buffer	2021-09-06	4-5	13	12
Buffer	2021-09-06	4-6	5	20
Buffer	2021-09-06	4-7	9	1
Buffer	2021-09-06	4-8	0	0
Buffer	2021-09-06	4-9	1	12
Buffer	2021-09-06	6-1-1(611)	6	30
Buffer	2021-09-06	6-2-1(621)	2	42
Buffer	2021-09-06	6-3-1(631)	0	14
Buffer	2021-09-06	6-4	0	3
Buffer	2021-09-06	6-5	37	53
Buffer	2021-09-06	6-6	0	60
Buffer	2021-09-06	6-7	0	2
Buffer	2021-09-06	6-8	1	0
Buffer	2021-09-06	6-9	91	19
Buffer	2021-09-06	6-10	51	31
Buffer	2021-09-06	6-11	NA	NA
Buffer	2021-09-06	6-13	40	13
Buffer	2021-09-06	6-14	26	17
Buffer	2021-09-06	6-15	62	50
Buffer	2021-09-06	6-16	40	30
Buffer	2021-09-06	6-17	6	0
Buffer	2021-09-06	7-1	0	11
Buffer	2021-09-06	7-2	2	17
Buffer	2021-09-06	7-1-1(711)	28	30
Buffer	2021-09-06	7-2-1(721)	0	0
Buffer	2021-09-06	7-3-1(731)	0	54
Release	2021-09-13	2-1	0	2
Release	2021-09-13	2-2	116	37
Release	2021-09-13	2-4	0	0
Release	2021-09-13	2-5	0	2
Release	2021-09-13	2-6	65	2
Release	2021-09-13	2-7	1	4
Release	2021-09-13	2-8	0	0
Release	2021-09-13	2-9	0	0
Release	2021-09-13	3-1	0	0
Release	2021-09-13	3-2	0	0
Release	2021-09-13	3-3	41	0
Release	2021-09-13	3-4	199	73
Release	2021-09-13	3-5	0	0
Release	2021-09-13	3-6	34	21
Release	2021-09-13	A-3	0	1
Release	2021-09-13	A-1	0	0
Release	2021-09-13	A-2	0	0
Control	2021-09-13	A5-3	64	53
Control	2021-09-13	5-10	0	0
Control	2021-09-13	5-13	0	0
Control	2021-09-13	5-1	200	26
Control	2021-09-13	5-2	0	0
Control	2021-09-13	5-4	26	22
Control	2021-09-13	5-5	20	8
Control	2021-09-13	5-7	0	0
Control	2021-09-13	5-9	7	8
Control	2021-09-13	511	0	0
Control	2021-09-13	521	0	0
Control	2021-09-13	5-8	78	40
Control	2021-09-13	5-6	35	19
Control	2021-09-13	531	0	2
Control	2021-09-13	8-2	33	28
Control	2021-09-13	8-1	0	0
Control	2021-09-13	10-1	10	4
Control	2021-09-13	10-2	37	49
Control	2021-09-13	10-3	171	151
Control	2021-09-13	10-4	94	48
Control	2021-09-13	10-8	93	43
Control	2021-09-13	10-5	0	0
Control	2021-09-13	10-6	0	0
Control	2021-09-13	10-7	136	44
Control	2021-09-13	11-3	29	27
Control	2021-09-13	11-4	0	0
Control	2021-09-13	11-7	140	44
Control	2021-09-13	11-1	20	21
Control	2021-09-13	11-2	50	44
Control	2021-09-13	11-5	30	71
Control	2021-09-13	11-6	283	81
Control	2021-09-13	9-1	120	88
Control	2021-09-13	9-5	46	46
Control	2021-09-13	9-2	143	82
Control	2021-09-13	9-3	0	0
Control	2021-09-13	9-4	0	0
Control	2021-09-13	9-6	0	0
Control	2021-09-13	9-7	39	17
Control	2021-09-13	4-8	0	0
Control	2021-09-13	4-9	0	0
Buffer	2021-09-13	1-1	46	52
Buffer	2021-09-13	1-2	151	22
Buffer	2021-09-13	1-3	103	53
Buffer	2021-09-13	4-1	68	38
Buffer	2021-09-13	4-2	61	94
Buffer	2021-09-13	4-3	0	0
Buffer	2021-09-13	4-4	80	107
Buffer	2021-09-13	4-5	29	49
Buffer	2021-09-13	4-6	91	2
Buffer	2021-09-13	4-7	109	23
Buffer	2021-09-13	4-8	0	0
Buffer	2021-09-13	4-9	0	0
Buffer	2021-09-13	6-1-1(611)	169	80
Buffer	2021-09-13	6-2-1(621)	12	4
Buffer	2021-09-13	6-3-1(631)	37	34
Buffer	2021-09-13	6-4	71	63
Buffer	2021-09-13	6-5	325	66
Buffer	2021-09-13	6-6	0	0
Buffer	2021-09-13	6-7	0	0
Buffer	2021-09-13	6-8	42	22
Buffer	2021-09-13	6-9	52	42
Buffer	2021-09-13	6-10	128	46
Buffer	2021-09-13	6-11	27	6
Buffer	2021-09-13	6-13	0	0
Buffer	2021-09-13	6-14	NA	NA
Buffer	2021-09-13	6-15	0	0
Buffer	2021-09-13	6-16	86	13
Buffer	2021-09-13	6-17	0	0
Buffer	2021-09-13	7-1	73	51
Buffer	2021-09-13	7-2	0	0
Buffer	2021-09-13	7-1-1(711)	1	0
Buffer	2021-09-13	7-2-1(721)	98	38
Buffer	2021-09-13	7-3-1(731)	20	14
Release	2021-09-21	2-1	0	0
Release	2021-09-21	2-2	0	0
Release	2021-09-21	2-4	41	0
Release	2021-09-21	2-5	0	0
Release	2021-09-21	2-6	15	19
Release	2021-09-21	2-7	0	0
Release	2021-09-21	2-8	20	2
Release	2021-09-21	2-9	0	0
Release	2021-09-21	3-1	0	0
Release	2021-09-21	3-2	0	0
Release	2021-09-21	3-3	0	0
Release	2021-09-21	3-4	0	0
Release	2021-09-21	3-5	0	0
Release	2021-09-21	3-6	28	47
Release	2021-09-21	A-3	0	0
Release	2021-09-21	A-1	39	23
Release	2021-09-21	A-2	0	0
Control	2021-09-21	A5-3	3	4
Control	2021-09-21	5-10	0	0
Control	2021-09-21	5-13	0	1
Control	2021-09-21	5-1	139	69
Control	2021-09-21	5-2	0	0
Control	2021-09-21	5-4	59	91
Control	2021-09-21	5-5	35	11
Control	2021-09-21	5-7	29	9
Control	2021-09-21	5-9	0	0
Control	2021-09-21	511	168	143
Control	2021-09-21	521	30	3
Control	2021-09-21	5-8	0	0
Control	2021-09-21	5-6	0	0
Control	2021-09-21	531	0	0
Control	2021-09-21	8-2	0	0
Control	2021-09-21	8-1	11	5
Control	2021-09-21	10-1	130	77
Control	2021-09-21	10-2	0	0
Control	2021-09-21	10-3	14	101
Control	2021-09-21	10-4	105	83
Control	2021-09-21	10-8	234	102
Control	2021-09-21	10-5	0	0
Control	2021-09-21	10-6	360	76
Control	2021-09-21	10-7	138	116
Control	2021-09-21	11-3	111	48
Control	2021-09-21	11-4	27	42
Control	2021-09-21	11-7	188	113
Control	2021-09-21	11-1	68	29
Control	2021-09-21	11-2	0	0
Control	2021-09-21	11-5	179	101
Control	2021-09-21	11-6	57	56
Control	2021-09-21	9-1	0	23
Control	2021-09-21	9-5	90	76
Control	2021-09-21	9-2	0	0
Control	2021-09-21	9-3	20	67
Control	2021-09-21	9-4	0	0
Control	2021-09-21	9-6	29	27
Control	2021-09-21	9-7	60	64
Control	2021-09-21	4-8	0	0
Control	2021-09-21	4-9	0	0
Buffer	2021-09-21	1-1	37	33
Buffer	2021-09-21	1-2	250	28
Buffer	2021-09-21	1-3	0	0
Buffer	2021-09-21	4-1	0	0
Buffer	2021-09-21	4-2	22	18
Buffer	2021-09-21	4-3	0	0
Buffer	2021-09-21	4-4	0	0
Buffer	2021-09-21	4-5	0	0
Buffer	2021-09-21	4-6	39	24
Buffer	2021-09-21	4-7	0	0
Buffer	2021-09-21	4-8	0	0
Buffer	2021-09-21	4-9	0	0
Buffer	2021-09-21	6-1-1(611)	41	38
Buffer	2021-09-21	6-2-1(621)	NA	NA
Buffer	2021-09-21	6-3-1(631)	NA	NA
Buffer	2021-09-21	6-4	0	0
Buffer	2021-09-21	6-5	0	0
Buffer	2021-09-21	6-6	0	0
Buffer	2021-09-21	6-7	NA	NA
Buffer	2021-09-21	6-8	0	3
Buffer	2021-09-21	6-9	147	43
Buffer	2021-09-21	6-10	195	94
Buffer	2021-09-21	6-11	2	6
Buffer	2021-09-21	6-13	NA	NA
Buffer	2021-09-21	6-14	50	4
Buffer	2021-09-21	6-15	53	75
Buffer	2021-09-21	6-16	NA	NA
Buffer	2021-09-21	6-17	0	40
Buffer	2021-09-21	7-1	50	40
Buffer	2021-09-21	7-2	NA	NA
Buffer	2021-09-21	7-1-1(711)	60	37
Buffer	2021-09-21	7-2-1(721)	174	156
Buffer	2021-09-21	7-3-1(731)	NA	NA
Release	2021-09-27	2-1	0	0
Release	2021-09-27	2-2	0	0
Release	2021-09-27	2-4	0	0
Release	2021-09-27	2-5	0	0
Release	2021-09-27	2-6	0	0
Release	2021-09-27	2-7	0	0
Release	2021-09-27	2-8	0	0
Release	2021-09-27	2-9	0	0
Release	2021-09-27	3-1	0	0
Release	2021-09-27	3-2	0	0
Release	2021-09-27	3-3	0	0
Release	2021-09-27	3-4	0	9
Release	2021-09-27	3-5	0	0
Release	2021-09-27	3-6	66	34
Release	2021-09-27	A-3	28	0
Release	2021-09-27	A-1	0	0
Release	2021-09-27	A-2	47	48
Control	2021-09-27	A5-3	65	35
Control	2021-09-27	5-10	39	40
Control	2021-09-27	5-13	21	19
Control	2021-09-27	5-1	0	0
Control	2021-09-27	5-2	0	18
Control	2021-09-27	5-4	71	74
Control	2021-09-27	5-5	24	28
Control	2021-09-27	5-7	35	31
Control	2021-09-27	5-9	95	44
Control	2021-09-27	511	0	0
Control	2021-09-27	521	0	0
Control	2021-09-27	5-8	0	3
Control	2021-09-27	5-6	0	0
Control	2021-09-27	531	16	12
Control	2021-09-27	8-2	0	0
Control	2021-09-27	8-1	13	26
Control	2021-09-27	10-1	76	13
Control	2021-09-27	10-2	130	33
Control	2021-09-27	10-3	192	67
Control	2021-09-27	10-4	42	33
Control	2021-09-27	10-8	96	85
Control	2021-09-27	10-5	45	77
Control	2021-09-27	10-6	11	16
Control	2021-09-27	10-7	169	38
Control	2021-09-27	11-3	64	19
Control	2021-09-27	11-4	0	0
Control	2021-09-27	11-7	66	84
Control	2021-09-27	11-1	21	29
Control	2021-09-27	11-2	219	8
Control	2021-09-27	11-5	156	70
Control	2021-09-27	11-6
Control	2021-09-27	9-1	141	26
Control	2021-09-27	9-5	33	42
Control	2021-09-27	9-2	23	31
Control	2021-09-27	9-3	0	0
Control	2021-09-27	9-4	0	0
Control	2021-09-27	9-6	16	27
Control	2021-09-27	9-7	255	78
Control	2021-09-27	4-8	0	0
Control	2021-09-27	4-9	0	0
Buffer	2021-09-27	1-1	0	0
Buffer	2021-09-27	1-2	86	34
Buffer	2021-09-27	1-3	0	0
Buffer	2021-09-27	4-1	0	0
Buffer	2021-09-27	4-2	85	38
Buffer	2021-09-27	4-3	0	0
Buffer	2021-09-27	4-4	0	0
Buffer	2021-09-27	4-5	0	0
Buffer	2021-09-27	4-6	0	0
Buffer	2021-09-27	4-7	0	0
Buffer	2021-09-27	4-8	0	0
Buffer	2021-09-27	4-9	0	0
Buffer	2021-09-27	6-1-1(611)	19	16
Buffer	2021-09-27	6-2-1(621)	52	91
Buffer	2021-09-27	6-3-1(631)	0	0
Buffer	2021-09-27	6-4	0	0
Buffer	2021-09-27	6-5	92	26
Buffer	2021-09-27	6-6	58	37
Buffer	2021-09-27	6-7	168	60
Buffer	2021-09-27	6-8	0	0
Buffer	2021-09-27	6-9	0	4
Buffer	2021-09-27	6-10	0	0
Buffer	2021-09-27	6-11	0	0
Buffer	2021-09-27	6-13	0	0
Buffer	2021-09-27	6-14	0	0
Buffer	2021-09-27	6-15	0	0
Buffer	2021-09-27	6-16	100	36
Buffer	2021-09-27	6-17	81	33
Buffer	2021-09-27	7-1	0	0
Buffer	2021-09-27	7-2	0	0
Buffer	2021-09-27	7-1-1(711)	71	37
Buffer	2021-09-27	7-2-1(721)	59	104
Buffer	2021-09-27	7-3-1(731)	NA	NA
Release	2021-10-04	2-1	0	0
Release	2021-10-04	2-2	43	35
Release	2021-10-04	2-4	4	17
Release	2021-10-04	2-5	0	0
Release	2021-10-04	2-6	23	52
Release	2021-10-04	2-7	0	0
Release	2021-10-04	2-8	0	0
Release	2021-10-04	2-9	0	0
Release	2021-10-04	3-1	0	0
Release	2021-10-04	3-2	0	0
Release	2021-10-04	3-3	74	51
Release	2021-10-04	3-4	19	34
Release	2021-10-04	3-5	74	105
Release	2021-10-04	3-6	0	2
Release	2021-10-04	A-3	55	0
Release	2021-10-04	A-1	68	0
Release	2021-10-04	A-2	207	33
Control	2021-10-04	A5-3	77	93
Control	2021-10-04	5-10	0	2
Control	2021-10-04	5-13	0	0
Control	2021-10-04	5-1	88	24
Control	2021-10-04	5-2	0	0
Control	2021-10-04	5-4	24	110
Control	2021-10-04	5-5	0	8
Control	2021-10-04	5-7	0	0
Control	2021-10-04	5-9	50	20
Control	2021-10-04	511	10	53
Control	2021-10-04	521	70	28
Control	2021-10-04	5-8	45	52
Control	2021-10-04	5-6	33	73
Control	2021-10-04	531	288	45
Control	2021-10-04	8-2	63	12
Control	2021-10-04	8-1	0	0
Control	2021-10-04	10-1	185	30
Control	2021-10-04	10-2	22	18
Control	2021-10-04	10-3	54	94
Control	2021-10-04	10-4	18	12
Control	2021-10-04	10-8	132	49
Control	2021-10-04	10-5	107	34
Control	2021-10-04	10-6	0	0
Control	2021-10-04	10-7	82	31
Control	2021-10-04	11-3	108	88
Control	2021-10-04	11-4	0	0
Control	2021-10-04	11-7	415	112
Control	2021-10-04	11-1	6	32
Control	2021-10-04	11-2	72	46
Control	2021-10-04	11-5	0	0
Control	2021-10-04	11-6	4	66
Control	2021-10-04	9-1	171	42
Control	2021-10-04	9-5	59	0
Control	2021-10-04	9-2	134	12
Control	2021-10-04	9-3	98	49
Control	2021-10-04	9-4	0	0
Control	2021-10-04	9-6	0	58
Control	2021-10-04	9-7	122	47
Control	2021-10-04	4-8	69	23
Control	2021-10-04	4-9	42	46
Buffer	2021-10-04	1-1	0	0
Buffer	2021-10-04	1-2	2	28
Buffer	2021-10-04	1-3	374	73
Buffer	2021-10-04	4-1	7	0
Buffer	2021-10-04	4-2	2	7
Buffer	2021-10-04	4-3	69	32
Buffer	2021-10-04	4-4	22	38
Buffer	2021-10-04	4-5	58	43
Buffer	2021-10-04	4-6	0	0
Buffer	2021-10-04	4-7	37	11
Buffer	2021-10-04	4-8	69	23
Buffer	2021-10-04	4-9	42	46
Buffer	2021-10-04	6-1-1(611)	NA	NA
Buffer	2021-10-04	6-2-1(621)	0	9
Buffer	2021-10-04	6-3-1(631)	43	27
Buffer	2021-10-04	6-4	87	71
Buffer	2021-10-04	6-5	64	8
Buffer	2021-10-04	6-6	3	25
Buffer	2021-10-04	6-7	10	2
Buffer	2021-10-04	6-8	30	30
Buffer	2021-10-04	6-9	18	0
Buffer	2021-10-04	6-10	91	64
Buffer	2021-10-04	6-11	0	0
Buffer	2021-10-04	6-13	30	4
Buffer	2021-10-04	6-14	53	54
Buffer	2021-10-04	6-15	40	106
Buffer	2021-10-04	6-16	71	47
Buffer	2021-10-04	6-17	47	30
Buffer	2021-10-04	7-1	57	77
Buffer	2021-10-04	7-2	0	0
Buffer	2021-10-04	7-1-1(711)	124	54
Buffer	2021-10-04	7-2-1(721)	88	87
Buffer	2021-10-04	7-3-1(731)	162	26
Release	2021-10-11	2-1	0	0
Release	2021-10-11	2-2	0	0
Release	2021-10-11	2-4	28	13
Release	2021-10-11	2-5	0	0
Release	2021-10-11	2-6	0	0
Release	2021-10-11	2-7	27	20
Release	2021-10-11	2-8	0	0
Release	2021-10-11	2-9	0	0
Release	2021-10-11	3-1	0	0
Release	2021-10-11	3-2	0	0
Release	2021-10-11	3-3	67	55
Release	2021-10-11	3-4	71	49
Release	2021-10-11	3-5	126	28
Release	2021-10-11	3-6	73	45
Release	2021-10-11	A-3	24	15
Release	2021-10-11	A-1	0	0
Release	2021-10-11	A-2	0	0
Control	2021-10-11	A5-3	8	3
Control	2021-10-11	5-10	22	14
Control	2021-10-11	5-13	0	0
Control	2021-10-11	5-1	101	21
Control	2021-10-11	5-2	40	31
Control	2021-10-11	5-4	0	0
Control	2021-10-11	5-5	40	28
Control	2021-10-11	5-7	0	0
Control	2021-10-11	5-9	3	3
Control	2021-10-11	511	32	59
Control	2021-10-11	521	0	0
Control	2021-10-11	5-8	107	36
Control	2021-10-11	5-6	59	38
Control	2021-10-11	531	70	65
Control	2021-10-11	8-2	0	0
Control	2021-10-11	8-1	48	30
Control	2021-10-11	10-1	0	0
Control	2021-10-11	10-2	49	9
Control	2021-10-11	10-3	49	37
Control	2021-10-11	10-4	53	24
Control	2021-10-11	10-8	78	19
Control	2021-10-11	10-5	76	63
Control	2021-10-11	10-6	20	21
Control	2021-10-11	10-7	140	111
Control	2021-10-11	11-3	12	24
Control	2021-10-11	11-4	263	15
Control	2021-10-11	11-7	123	91
Control	2021-10-11	11-1	22	9
Control	2021-10-11	11-2	0	0
Control	2021-10-11	11-5	30	27
Control	2021-10-11	11-6	31	27
Control	2021-10-11	9-1	66	9
Control	2021-10-11	9-5	38	4
Control	2021-10-11	9-2	23	11
Control	2021-10-11	9-3	58	9
Control	2021-10-11	9-4	0	0
Control	2021-10-11	9-6	85	65
Control	2021-10-11	9-7	152	85
Control	2021-10-11	4-8	14	14
Control	2021-10-11	4-9	37	2
Buffer	2021-10-11	1-1	0	0
Buffer	2021-10-11	1-2	62	32
Buffer	2021-10-11	1-3	0	0
Buffer	2021-10-11	4-1	38	8
Buffer	2021-10-11	4-2	0	0
Buffer	2021-10-11	4-3	12	38
Buffer	2021-10-11	4-4	20	27
Buffer	2021-10-11	4-5	0	0
Buffer	2021-10-11	4-6	32	53
Buffer	2021-10-11	4-7	89	50
Buffer	2021-10-11	4-8	14	14
Buffer	2021-10-11	4-9	37	2
Buffer	2021-10-11	6-1-1(611)	NA	NA
Buffer	2021-10-11	6-2-1(621)	61	60
Buffer	2021-10-11	6-3-1(631)	0	0
Buffer	2021-10-11	6-4	34	36
Buffer	2021-10-11	6-5	0	0
Buffer	2021-10-11	6-6	11	37
Buffer	2021-10-11	6-7	7	3
Buffer	2021-10-11	6-8	60	0
Buffer	2021-10-11	6-9	0	0
Buffer	2021-10-11	6-10	0	0
Buffer	2021-10-11	6-11	5	15
Buffer	2021-10-11	6-13	72	38
Buffer	2021-10-11	6-14	0	0
Buffer	2021-10-11	6-15	17	9
Buffer	2021-10-11	6-16	77	43
Buffer	2021-10-11	6-17	0	0
Buffer	2021-10-11	7-1	24	1
Buffer	2021-10-11	7-2	0	0
Buffer	2021-10-11	7-1-1(711)	25	0
Buffer	2021-10-11	7-2-1(721)	0	0
Buffer	2021-10-11	7-3-1(731)	0	0
Release	2021-10-18	2-1	0	0
Release	2021-10-18	2-2	0	0
Release	2021-10-18	2-4	53	28
Release	2021-10-18	2-5	57	20
Release	2021-10-18	2-6	0	0
Release	2021-10-18	2-7	3	0
Release	2021-10-18	2-8	0	0
Release	2021-10-18	2-9	0	0
Release	2021-10-18	3-1	90	17
Release	2021-10-18	3-2	0	0
Release	2021-10-18	3-3	65	13
Release	2021-10-18	3-4	0	0
Release	2021-10-18	3-5	183	37
Release	2021-10-18	3-6	69	28
Release	2021-10-18	A-3	0	0
Release	2021-10-18	A-1	0	0
Release	2021-10-18	A-2	78	38
Control	2021-10-18	A5-3	58	5
Control	2021-10-18	5-10	46	8
Control	2021-10-18	5-13	23	21
Control	2021-10-18	5-1	109	95
Control	2021-10-18	5-2	0	0
Control	2021-10-18	5-4	197	98
Control	2021-10-18	5-5	0	0
Control	2021-10-18	5-7	0	0
Control	2021-10-18	5-9	0	0
Control	2021-10-18	511	0	0
Control	2021-10-18	521	0	0
Control	2021-10-18	5-8	0	0
Control	2021-10-18	5-6	177	37
Control	2021-10-18	531	55	28
Control	2021-10-18	8-2	82	60
Control	2021-10-18	8-1	0	0
Control	2021-10-18	10-1	0	0
Control	2021-10-18	10-2	35	29
Control	2021-10-18	10-3	0	0
Control	2021-10-18	10-4	0	0
Control	2021-10-18	10-8	148	32
Control	2021-10-18	10-5	333	99
Control	2021-10-18	10-6	16	2
Control	2021-10-18	10-7	46	0
Control	2021-10-18	11-3	0	53
Control	2021-10-18	11-4	0	0
Control	2021-10-18	11-7	56	0
Control	2021-10-18	11-1	149	46
Control	2021-10-18	11-2	88	24
Control	2021-10-18	11-5	53	8
Control	2021-10-18	11-6	76	107
Control	2021-10-18	9-1	223	53
Control	2021-10-18	9-5	11	16
Control	2021-10-18	9-2	0	0
Control	2021-10-18	9-3	103	38
Control	2021-10-18	9-4	0	0
Control	2021-10-18	9-6	91	47
Control	2021-10-18	9-7	166	101
Control	2021-10-18	4-8	0	0
Control	2021-10-18	4-9	0	0
Buffer	2021-10-18	1-1	5	2
Buffer	2021-10-18	1-2	0	59
Buffer	2021-10-18	1-3	68	0
Buffer	2021-10-18	4-1	62	30
Buffer	2021-10-18	4-2	0	0
Buffer	2021-10-18	4-3	0	0
Buffer	2021-10-18	4-4	0	0
Buffer	2021-10-18	4-5	0	0
Buffer	2021-10-18	4-6	233	64
Buffer	2021-10-18	4-7	116	59
Buffer	2021-10-18	4-8	0	0
Buffer	2021-10-18	4-9	0	0
Buffer	2021-10-18	6-1-1(611)	NA	NA
Buffer	2021-10-18	6-2-1(621)	43	2
Buffer	2021-10-18	6-3-1(631)	0	0
Buffer	2021-10-18	6-4	15	9
Buffer	2021-10-18	6-5	0	0
Buffer	2021-10-18	6-6	0	0
Buffer	2021-10-18	6-7	0	0
Buffer	2021-10-18	6-8	0	0
Buffer	2021-10-18	6-9	0	0
Buffer	2021-10-18	6-10	93	0
Buffer	2021-10-18	6-11	66	4
Buffer	2021-10-18	6-13	0	0
Buffer	2021-10-18	6-14	0	0
Buffer	2021-10-18	6-15	24	0
Buffer	2021-10-18	6-16	187	159
Buffer	2021-10-18	6-17	3	0
Buffer	2021-10-18	7-1	0	0
Buffer	2021-10-18	7-2	0	0
Buffer	2021-10-18	7-1-1(711)	51	7
Buffer	2021-10-18	7-2-1(721)	18	0
Buffer	2021-10-18	7-3-1(731)	70	15
Release	2021-10-25	2-1	0	0
Release	2021-10-25	2-2	14	31
Release	2021-10-25	2-4	115	44
Release	2021-10-25	2-5	0	0
Release	2021-10-25	2-6	0	0
Release	2021-10-25	2-7	0	0
Release	2021-10-25	2-8	51	29
Release	2021-10-25	2-9	0	0
Release	2021-10-25	3-1	0	0
Release	2021-10-25	3-2	0	0
Release	2021-10-25	3-3	0	0
Release	2021-10-25	3-4	0	0
Release	2021-10-25	3-5	0	0
Release	2021-10-25	3-6	0	0
Release	2021-10-25	A-3	0	0
Release	2021-10-25	A-1	0	0
Release	2021-10-25	A-2	0	0
Control	2021-10-25	A5-3	0	0
Control	2021-10-25	5-10	15	35
Control	2021-10-25	5-13	0	0
Control	2021-10-25	5-1	0	0
Control	2021-10-25	5-2	0	0
Control	2021-10-25	5-4	0	0
Control	2021-10-25	5-5	0	0
Control	2021-10-25	5-7	0	0
Control	2021-10-25	5-9	21	0
Control	2021-10-25	511	153	20
Control	2021-10-25	521	0	0
Control	2021-10-25	5-8	0	0
Control	2021-10-25	5-6	0	0
Control	2021-10-25	531	190	123
Control	2021-10-25	8-2	125	27
Control	2021-10-25	8-1	0	0
Control	2021-10-25	10-1	0	0
Control	2021-10-25	10-2	116	59
Control	2021-10-25	10-3	154	93
Control	2021-10-25	10-4	0	0
Control	2021-10-25	10-8	259	69
Control	2021-10-25	10-5	0	0
Control	2021-10-25	10-6	0	0
Control	2021-10-25	10-7	281	101
Control	2021-10-25	11-3	0	0
Control	2021-10-25	11-4	0	0
Control	2021-10-25	11-7	91	37
Control	2021-10-25	11-1	0	0
Control	2021-10-25	11-2	0	0
Control	2021-10-25	11-5	216	40
Control	2021-10-25	11-6	0	0
Control	2021-10-25	9-1	119	40
Control	2021-10-25	9-5	183	93
Control	2021-10-25	9-2	0	0
Control	2021-10-25	9-3	45	53
Control	2021-10-25	9-4	0	0
Control	2021-10-25	9-6	43	4
Control	2021-10-25	9-7	0	0
Control	2021-10-25	4-8	0	0
Control	2021-10-25	4-9	0	0
Buffer	2021-10-25	1-1	NA	NA
Buffer	2021-10-25	1-2	NA	NA
Buffer	2021-10-25	1-3	NA	NA
Buffer	2021-10-25	4-1	NA	NA
Buffer	2021-10-25	4-2	0	0
Buffer	2021-10-25	4-3	NA	NA
Buffer	2021-10-25	4-4	3	0
Buffer	2021-10-25	4-5	NA	NA
Buffer	2021-10-25	4-6	NA	NA
Buffer	2021-10-25	4-7	NA	NA
Buffer	2021-10-25	4-8	NA	NA
Buffer	2021-10-25	4-9	NA	NA
Buffer	2021-10-25	6-1-1(611)	NA	NA
Buffer	2021-10-25	6-2-1(621)	49	41
Buffer	2021-10-25	6-3-1(631)	0	0
Buffer	2021-10-25	6-4	0	0
Buffer	2021-10-25	6-5	13	43
Buffer	2021-10-25	6-6	0	0
Buffer	2021-10-25	6-7	165	60
Buffer	2021-10-25	6-8	25	29
Buffer	2021-10-25	6-9	20	0
Buffer	2021-10-25	6-10	34	54
Buffer	2021-10-25	6-11	25	0
Buffer	2021-10-25	6-13	138	51
Buffer	2021-10-25	6-14	45	58
Buffer	2021-10-25	6-15	NA	NA
Buffer	2021-10-25	6-16	399	61
Buffer	2021-10-25	6-17	NA	NA
Buffer	2021-10-25	7-1	256	104
Buffer	2021-10-25	7-2	0	0
Buffer	2021-10-25	7-1-1(711)	157	34
Buffer	2021-10-25	7-2-1(721)	0	0
Buffer	2021-10-25	7-3-1(731)	71	46
Release	2021-11-01	2-1	36	21
Release	2021-11-01	2-2	0	0
Release	2021-11-01	2-4	0	0
Release	2021-11-01	2-5	9	7
Release	2021-11-01	2-6	0	0
Release	2021-11-01	2-7	42	2
Release	2021-11-01	2-8	75	60
Release	2021-11-01	2-9	0	0
Release	2021-11-01	3-1	0	0
Release	2021-11-01	3-2	0	0
Release	2021-11-01	3-3	0	0
Release	2021-11-01	3-4	0	0
Release	2021-11-01	3-5	0	0
Release	2021-11-01	3-6	76	23
Release	2021-11-01	A-3	0	0
Release	2021-11-01	A-1	0	0
Release	2021-11-01	A-2	0	0
Control	2021-11-01	A5-3	0	0
Control	2021-11-01	5-10	0	0
Control	2021-11-01	5-13	96	0
Control	2021-11-01	5-1	0	0
Control	2021-11-01	5-2	0	0
Control	2021-11-01	5-4	0	0
Control	2021-11-01	5-5	0	0
Control	2021-11-01	5-7	0	0
Control	2021-11-01	5-9	0	0
Control	2021-11-01	511	54	22
Control	2021-11-01	521	0	0
Control	2021-11-01	5-8	0	0
Control	2021-11-01	5-6	0	0
Control	2021-11-01	531	0	0
Control	2021-11-01	8-2	41	30
Control	2021-11-01	8-1	0	0
Control	2021-11-01	10-1	0	0
Control	2021-11-01	10-2	169	15
Control	2021-11-01	10-3	0	0
Control	2021-11-01	10-4	53	12
Control	2021-11-01	10-8	0	0
Control	2021-11-01	10-5	12	18
Control	2021-11-01	10-6	73	2
Control	2021-11-01	10-7	0	0
Control	2021-11-01	11-3	145	17
Control	2021-11-01	11-4	71	80
Control	2021-11-01	11-7	17	17
Control	2021-11-01	11-1	218	101
Control	2021-11-01	11-2	99	50
Control	2021-11-01	11-5	36	137
Control	2021-11-01	11-6	0	0
Control	2021-11-01	9-1	123	13
Control	2021-11-01	9-5	0	0
Control	2021-11-01	9-2	42	0
Control	2021-11-01	9-3	7	19
Control	2021-11-01	9-4	0	0
Control	2021-11-01	9-6	0	0
Control	2021-11-01	9-7	64	47
Control	2021-11-01	4-8	146	121
Control	2021-11-01	4-9	0	0
Buffer	2021-11-01	1-1	28	28
Buffer	2021-11-01	1-2	21	0
Buffer	2021-11-01	1-3	62	2
Buffer	2021-11-01	4-1	0	0
Buffer	2021-11-01	4-2	0	0
Buffer	2021-11-01	4-3	17	0
Buffer	2021-11-01	4-4	0	0
Buffer	2021-11-01	4-5	0	0
Buffer	2021-11-01	4-6	49	16
Buffer	2021-11-01	4-7	0	0
Buffer	2021-11-01	4-8	146	121
Buffer	2021-11-01	4-9	0	0
Buffer	2021-11-01	6-1-1(611)	NA	NA
Buffer	2021-11-01	6-2-1(621)	0	0
Buffer	2021-11-01	6-3-1(631)	0	0
Buffer	2021-11-01	6-4	0	0
Buffer	2021-11-01	6-5	0	0
Buffer	2021-11-01	6-6	0	0
Buffer	2021-11-01	6-7	0	0
Buffer	2021-11-01	6-8	0	0
Buffer	2021-11-01	6-9	0	0
Buffer	2021-11-01	6-10	47	25
Buffer	2021-11-01	6-11	56	19
Buffer	2021-11-01	6-13	225	59
Buffer	2021-11-01	6-14	0	0
Buffer	2021-11-01	6-15	0	0
Buffer	2021-11-01	6-16	0	0
Buffer	2021-11-01	6-17	11	18
Buffer	2021-11-01	7-1	0	0
Buffer	2021-11-01	7-2	0	0
Buffer	2021-11-01	7-1-1(711)	0	0
Buffer	2021-11-01	7-2-1(721)	0	0
Buffer	2021-11-01	7-3-1(731)	0	0
Release	2021-11-15	2-1	0	0
Release	2021-11-15	2-2	0	0
Release	2021-11-15	2-4	0	0
Release	2021-11-15	2-5	54	30
Release	2021-11-15	2-6	1	0
Release	2021-11-15	2-7	0	0
Release	2021-11-15	2-8	0	0
Release	2021-11-15	2-9	0	0
Release	2021-11-15	3-1	0	0
Release	2021-11-15	3-2	0	0
Release	2021-11-15	3-3	0	0
Release	2021-11-15	3-4	41	34
Release	2021-11-15	3-5	0	0
Release	2021-11-15	3-6	29	23
Release	2021-11-15	A-3	0	0
Release	2021-11-15	A-1	0	0
Release	2021-11-15	A-2	0	0
Control	2021-11-15	A5-3	0	0
Control	2021-11-15	5-10	0	0
Control	2021-11-15	5-13	0	0
Control	2021-11-15	5-1	0	0
Control	2021-11-15	5-2	0	0
Control	2021-11-15	5-4	0	0
Control	2021-11-15	5-5	0	0
Control	2021-11-15	5-7	0	0
Control	2021-11-15	5-9	0	0
Control	2021-11-15	511	0	0
Control	2021-11-15	521	0	0
Control	2021-11-15	5-8	0	0
Control	2021-11-15	5-6	0	0
Control	2021-11-15	531	110	0
Control	2021-11-15	8-2	9	4
Control	2021-11-15	8-1	0	0
Control	2021-11-15	10-1	0	0
Control	2021-11-15	10-2	0	0
Control	2021-11-15	10-3	0	0
Control	2021-11-15	10-4	0	0
Control	2021-11-15	10-8	0	0
Control	2021-11-15	10-5	32	16
Control	2021-11-15	10-6	0	0
Control	2021-11-15	10-7	0	0
Control	2021-11-15	11-3	0	0
Control	2021-11-15	11-4	0	0
Control	2021-11-15	11-7	0	0
Control	2021-11-15	11-1	120	109
Control	2021-11-15	11-2	0	0
Control	2021-11-15	11-5	0	0
Control	2021-11-15	11-6	0	0
Control	2021-11-15	9-1	0	0
Control	2021-11-15	9-5	0	0
Control	2021-11-15	9-2	38	26
Control	2021-11-15	9-3	0	0
Control	2021-11-15	9-4	0	0
Control	2021-11-15	9-6	0	0
Control	2021-11-15	9-7	23	0
Control	2021-11-15	4-8	44	35
Control	2021-11-15	4-9	0	0
Buffer	2021-11-15	1-1	37	0
Buffer	2021-11-15	1-2	0	0
Buffer	2021-11-15	1-3	0	0
Buffer	2021-11-15	4-1	0	0
Buffer	2021-11-15	4-2	0	0
Buffer	2021-11-15	4-3	0	0
Buffer	2021-11-15	4-4	0	0
Buffer	2021-11-15	4-5	17	1
Buffer	2021-11-15	4-6	0	0
Buffer	2021-11-15	4-7	0	0
Buffer	2021-11-15	4-8	44	35
Buffer	2021-11-15	4-9	0	0
Buffer	2021-11-15	6-1-1(611)	NA	NA
Buffer	2021-11-15	6-2-1(621)	41	0
Buffer	2021-11-15	6-3-1(631)	0	0
Buffer	2021-11-15	6-4	0	0
Buffer	2021-11-15	6-5	0	0
Buffer	2021-11-15	6-6	0	0
Buffer	2021-11-15	6-7	58	5
Buffer	2021-11-15	6-8	0	0
Buffer	2021-11-15	6-9	0	0
Buffer	2021-11-15	6-10	7	0
Buffer	2021-11-15	6-11	0	0
Buffer	2021-11-15	6-13	121	2
Buffer	2021-11-15	6-14	0	0
Buffer	2021-11-15	6-15	0	0
Buffer	2021-11-15	6-16	0	0
Buffer	2021-11-15	6-17	0	0
Buffer	2021-11-15	7-1	0	0
Buffer	2021-11-15	7-2	0	0
Buffer	2021-11-15	7-1-1(711)	0	0
Buffer	2021-11-15	7-2-1(721)	0	0
Buffer	2021-11-15	7-3-1(731)	0	0
Release	2021-11-23	2-1	0	0
Release	2021-11-23	2-2	0	0
Release	2021-11-23	2-4	64	11
Release	2021-11-23	2-5	0	0
Release	2021-11-23	2-6	0	0
Release	2021-11-23	2-7	0	0
Release	2021-11-23	2-8	0	0
Release	2021-11-23	2-9	0	0
Release	2021-11-23	3-1	0	0
Release	2021-11-23	3-2	0	0
Release	2021-11-23	3-3	73	42
Release	2021-11-23	3-4	0	0
Release	2021-11-23	3-5	0	0
Release	2021-11-23	3-6	0	0
Release	2021-11-23	A-3	0	0
Release	2021-11-23	A-1	0	0
Release	2021-11-23	A-2	0	0
Control	2021-11-23	A5-3	0	0
Control	2021-11-23	5-10	0	0
Control	2021-11-23	5-13	0	1
Control	2021-11-23	5-1	0	0
Control	2021-11-23	5-2	0	0
Control	2021-11-23	5-4	0	0
Control	2021-11-23	5-5	0	0
Control	2021-11-23	5-7	0	0
Control	2021-11-23	5-9	0	0
Control	2021-11-23	511	0	0
Control	2021-11-23	521	0	0
Control	2021-11-23	5-8	0	0
Control	2021-11-23	5-6	52	0
Control	2021-11-23	531	0	0
Control	2021-11-23	8-2	0	0
Control	2021-11-23	8-1	0	0
Control	2021-11-23	10-1	0	0
Control	2021-11-23	10-2	40	30
Control	2021-11-23	10-3	0	0
Control	2021-11-23	10-4	46	27
Control	2021-11-23	10-8	0	0
Control	2021-11-23	10-5	0	0
Control	2021-11-23	10-6	0	0
[truncated: 140 more rows]

## Sheet: BG_traps
Block	Date_set	Date_collect	trap_id	Total_males	Total_females	No_males_QPCR	GT_males	wild _males
Release	2021-08-19	2021-08-20	2	26	29	26	12	14
Release	2021-08-19	2021-08-20	3	7	6	7	6	1
Release	2021-08-19	2021-08-20	4	11	3	11	9	2
Release	2021-08-19	2021-08-20	5	9	14	9	5	4
Control	2021-08-19	2021-08-20	6	3	8	NA	NA	NA
Control	2021-08-19	2021-08-20	7	10	30	NA	NA	NA
Control	2021-08-19	2021-08-20	8	13	1	NA	NA	NA
Control	2021-08-19	2021-08-20	9	4	17	NA	NA	NA
Control	2021-08-19	2021-08-20	13	2	2	NA	NA	NA
Control	2021-08-19	2021-08-20	15	3	9	NA	NA	NA
Buffer	2021-08-19	2021-08-20	1	25	29	NA	NA	NA
Buffer	2021-08-19	2021-08-20	11	4	6	NA	NA	NA
Buffer	2021-08-19	2021-08-20	12	2	2	NA	NA	NA
Buffer	2021-08-19	2021-08-20	14	4	14	NA	NA	NA
Buffer	2021-08-19	2021-08-20	10	5	16	NA	NA	NA
Release	2021-08-25	2021-08-26	2	15	27	15	6	9
Release	2021-08-25	2021-08-26	3	99	8	34	33	1
Release	2021-08-25	2021-08-26	4	28	10	28	16	12
Release	2021-08-25	2021-08-26	5	19	7	19	6	13
Control	2021-08-25	2021-08-26	6	32	12	NA	NA	NA
Control	2021-08-25	2021-08-26	7	16	11	NA	NA	NA
Control	2021-08-25	2021-08-26	8	6	12	NA	NA	NA
Control	2021-08-25	2021-08-26	9	11	16	NA	NA	NA
Control	2021-08-25	2021-08-26	13	6	9	NA	NA	NA
Control	2021-08-25	2021-08-26	15	9	14	NA	NA	NA
Buffer	2021-08-25	2021-08-26	1	26	16	NA	NA	NA
Buffer	2021-08-25	2021-08-26	11	5	6	NA	NA	NA
Buffer	2021-08-25	2021-08-26	12	2	3	NA	NA	NA
Buffer	2021-08-25	2021-08-26	14	4	2	NA	NA	NA
Buffer	2021-08-25	2021-08-26	10	4	9	NA	NA	NA
Release	2021-09-01	2021-09-02	2	10	5	10	2	8
Release	2021-09-01	2021-09-02	3	6	3	6	4	2
Release	2021-09-01	2021-09-02	4	7	2	7	5	2
Release	2021-09-01	2021-09-02	5	104	7	34	20	14
Control	2021-09-01	2021-09-02	6	4	4	NA	NA	NA
Control	2021-09-01	2021-09-02	7	18	7	NA	NA	NA
Control	2021-09-01	2021-09-02	8	2	2	NA	NA	NA
Control	2021-09-01	2021-09-02	9	2	5	NA	NA	NA
Control	2021-09-01	2021-09-02	13	3	0	NA	NA	NA
Control	2021-09-01	2021-09-02	15	6	10	NA	NA	NA
Buffer	2021-09-01	2021-09-02	1	7	8	NA	NA	NA
Buffer	2021-09-01	2021-09-02	11	5	2	NA	NA	NA
Buffer	2021-09-01	2021-09-02	12	0	0	NA	NA	NA
Buffer	2021-09-01	2021-09-02	14	13	11	NA	NA	NA
Buffer	2021-09-01	2021-09-02	10	3	3	NA	NA	NA
Release	2021-09-08	2021-09-09	2	27	12	27	21	6
Release	2021-09-08	2021-09-09	3	59	4	29	29	0
Release	2021-09-08	2021-09-09	4	60	3	30	24	6
Release	2021-09-08	2021-09-09	5	206	12	61	57	4
Control	2021-09-08	2021-09-09	6	51	15	NA	NA	NA
Control	2021-09-08	2021-09-09	7	30	15	NA	NA	NA
Control	2021-09-08	2021-09-09	8	2	2	NA	NA	NA
Control	2021-09-08	2021-09-09	9	3	5	NA	NA	NA
Control	2021-09-08	2021-09-09	13	19	7	NA	NA	NA
Control	2021-09-08	2021-09-09	15	12	12	NA	NA	NA
Buffer	2021-09-08	2021-09-09	1	40	23	NA	NA	NA
Buffer	2021-09-08	2021-09-09	11	7	7	NA	NA	NA
Buffer	2021-09-08	2021-09-09	12	21	4	NA	NA	NA
Buffer	2021-09-08	2021-09-09	14	26	9	NA	NA	NA
Buffer	2021-09-08	2021-09-09	10	3	2	NA	NA	NA
Release	2021-09-15	2021-09-16	2	28	1	28	23	5
Release	2021-09-15	2021-09-16	3	112	2	37	36	1
Release	2021-09-15	2021-09-16	4	77	2	36	34	2
Release	2021-09-15	2021-09-16	5	198	3	65	63	2
Control	2021-09-15	2021-09-16	6	12	4	NA	NA	NA
Control	2021-09-15	2021-09-16	7	2	2	NA	NA	NA
Control	2021-09-15	2021-09-16	8	2	7	NA	NA	NA
Control	2021-09-15	2021-09-16	9	1	2	NA	NA	NA
Control	2021-09-15	2021-09-16	13	3	3	NA	NA	NA
Control	2021-09-15	2021-09-16	15	7	5	NA	NA	NA
Buffer	2021-09-15	2021-09-16	1	29	18	NA	NA	NA
Buffer	2021-09-15	2021-09-16	11	4	0	NA	NA	NA
Buffer	2021-09-15	2021-09-16	12	2	3	NA	NA	NA
Buffer	2021-09-15	2021-09-16	14	12	3	NA	NA	NA
Buffer	2021-09-15	2021-09-16	10	1	2	NA	NA	NA
Release	2021-09-22	2021-09-23	2	15	12	15	8	7
Release	2021-09-22	2021-09-23	3	120	4	40	38	2
Release	2021-09-22	2021-09-23	4	159	6	53	46	7
Release	2021-09-22	2021-09-23	5	202	5	67	59	8
Control	2021-09-22	2021-09-23	6	48	27	NA	NA	NA
Control	2021-09-22	2021-09-23	7	13	12	NA	NA	NA
Control	2021-09-22	2021-09-23	8	2	17	NA	NA	NA
Control	2021-09-22	2021-09-23	9	4	5	NA	NA	NA
Control	2021-09-22	2021-09-23	13	10	12	NA	NA	NA
Control	2021-09-22	2021-09-23	15	3	7	NA	NA	NA
Buffer	2021-09-22	2021-09-23	1	145	47	NA	NA	NA
Buffer	2021-09-22	2021-09-23	11	9	7	NA	NA	NA
Buffer	2021-09-22	2021-09-23	12	7	4	NA	NA	NA
Buffer	2021-09-22	2021-09-23	14	47	12	NA	NA	NA
Buffer	2021-09-22	2021-09-23	10	2	3	NA	NA	NA
Release	2021-09-29	2021-09-30	2	77	18	38	35	3
Release	2021-09-29	2021-09-30	3	64	5	32	30	2
Release	2021-09-29	2021-09-30	4	47	4	25	25	0
Release	2021-09-29	2021-09-30	5	314	9	95	93	2
Control	2021-09-29	2021-09-30	6	16	15	NA	NA	NA
Control	2021-09-29	2021-09-30	7	0	10	NA	NA	NA
Control	2021-09-29	2021-09-30	8	5	5	NA	NA	NA
Control	2021-09-29	2021-09-30	9	0	4	NA	NA	NA
Control	2021-09-29	2021-09-30	13	14	2	NA	NA	NA
Control	2021-09-29	2021-09-30	15	9	8	NA	NA	NA
Buffer	2021-09-29	2021-09-30	1	74	34	NA	NA	NA
Buffer	2021-09-29	2021-09-30	11	4	4	NA	NA	NA
Buffer	2021-09-29	2021-09-30	12	7	3	NA	NA	NA
Buffer	2021-09-29	2021-09-30	14	4	9	NA	NA	NA
Buffer	2021-09-29	2021-09-30	10	2	3	NA	NA	NA
Release	2021-10-06	2021-10-07	2	46	7	22	21	1
Release	2021-10-06	2021-10-07	3	14	0	14	14	0
Release	2021-10-06	2021-10-07	4	287	3	50	49	1
Release	2021-10-06	2021-10-07	5	541	7	95	90	5
Control	2021-10-06	2021-10-07	6	3	5	NA	NA	NA
Control	2021-10-06	2021-10-07	7	24	10	NA	NA	NA
Control	2021-10-06	2021-10-07	8	3	0	NA	NA	NA
Control	2021-10-06	2021-10-07	9	6	9	NA	NA	NA
Control	2021-10-06	2021-10-07	13	9	3	NA	NA	NA
Control	2021-10-06	2021-10-07	15	18	12	NA	NA	NA
Buffer	2021-10-06	2021-10-07	1	20	13	NA	NA	NA
Buffer	2021-10-06	2021-10-07	11	0	1	NA	NA	NA
Buffer	2021-10-06	2021-10-07	12	20	5	NA	NA	NA
Buffer	2021-10-06	2021-10-07	14	48	10	NA	NA	NA
Buffer	2021-10-06	2021-10-07	10	1	4	NA	NA	NA
Release	2021-10-14	2021-10-15	2	37	12	18	16	2
Release	2021-10-14	2021-10-15	3	193	7	30	30	0
Release	2021-10-14	2021-10-15	4	143	9	30	30	0
Release	2021-10-14	2021-10-15	5	157	7	30	30	0
Control	2021-10-14	2021-10-15	6	19	21	NA	NA	NA
Control	2021-10-14	2021-10-15	7	8	19	NA	NA	NA
Control	2021-10-14	2021-10-15	8	4	11	NA	NA	NA
Control	2021-10-14	2021-10-15	9	6	12	NA	NA	NA
Control	2021-10-14	2021-10-15	13	1	15	NA	NA	NA
Control	2021-10-14	2021-10-15	15	5	9	NA	NA	NA
Buffer	2021-10-14	2021-10-15	1	32	20	NA	NA	NA
Buffer	2021-10-14	2021-10-15	11	1	2	NA	NA	NA
Buffer	2021-10-14	2021-10-15	12	4	6	NA	NA	NA
Buffer	2021-10-14	2021-10-15	14	4	16	NA	NA	NA
Buffer	2021-10-14	2021-10-15	10	4	6	NA	NA	NA
Release	2021-10-20	2021-10-21	2	12	2	12	11	1
Release	2021-10-20	2021-10-21	3	19	1	19	15	4
Release	2021-10-20	2021-10-21	4	41	2	20	20	0
Release	2021-10-20	2021-10-21	5	285	0	69	68	1
Control	2021-10-20	2021-10-21	6	5	5	NA	NA	NA
Control	2021-10-20	2021-10-21	7	5	0	NA	NA	NA
Control	2021-10-20	2021-10-21	8	3	4	NA	NA	NA
Control	2021-10-20	2021-10-21	9	3	2	NA	NA	NA
Control	2021-10-20	2021-10-21	13	2	0	NA	NA	NA
Control	2021-10-20	2021-10-21	15	15	3	NA	NA	NA
Buffer	2021-10-20	2021-10-21	1	26	12	NA	NA	NA
Buffer	2021-10-20	2021-10-21	11	2	2	NA	NA	NA
Buffer	2021-10-20	2021-10-21	12	10	1	NA	NA	NA
Buffer	2021-10-20	2021-10-21	14	8	0	NA	NA	NA
Buffer	2021-10-20	2021-10-21	10	1	1	NA	NA	NA
Release	2021-10-27	2021-10-28	2	17	4	17	15	2
Release	2021-10-27	2021-10-28	3	7	2	7	7	0
Release	2021-10-27	2021-10-28	4	34	4	17	16	1
Release	2021-10-27	2021-10-28	5	89	6	30	28	2
Control	2021-10-27	2021-10-28	6	7	13	NA	NA	NA
Control	2021-10-27	2021-10-28	7	0	9	NA	NA	NA
Control	2021-10-27	2021-10-28	8	2	2	NA	NA	NA
Control	2021-10-27	2021-10-28	9	2	2	NA	NA	NA
Control	2021-10-27	2021-10-28	13	3	11	NA	NA	NA
Control	2021-10-27	2021-10-28	15	1	6	NA	NA	NA
Buffer	2021-10-27	2021-10-28	1	17	13	NA	NA	NA
Buffer	2021-10-27	2021-10-28	11	0	1	NA	NA	NA
Buffer	2021-10-27	2021-10-28	12	5	5	NA	NA	NA
Buffer	2021-10-27	2021-10-28	14	3	9	NA	NA	NA
Buffer	2021-10-27	2021-10-28	10	0	6	NA	NA	NA
Release	2021-11-03	2021-11-04	2	9	1	9	8	1
Release	2021-11-03	2021-11-04	3	17	3	17	16	1
Release	2021-11-03	2021-11-04	4	29	0	29	29	0
Release	2021-11-03	2021-11-04	5	111	6	37	35	2
Control	2021-11-03	2021-11-04	6	5	7	NA	NA	NA
Control	2021-11-03	2021-11-04	7	1	3	NA	NA	NA
Control	2021-11-03	2021-11-04	8	0	2	NA	NA	NA
Control	2021-11-03	2021-11-04	9	1	3	NA	NA	NA
Control	2021-11-03	2021-11-04	13	5	4	NA	NA	NA
Control	2021-11-03	2021-11-04	15	0	7	NA	NA	NA
Buffer	2021-11-03	2021-11-04	1	7	8	NA	NA	NA
Buffer	2021-11-03	2021-11-04	11	0	1	NA	NA	NA
Buffer	2021-11-03	2021-11-04	12	1	2	NA	NA	NA
Buffer	2021-11-03	2021-11-04	14	10	5	NA	NA	NA
Buffer	2021-11-03	2021-11-04	10	4	1	NA	NA	NA
Release	2021-11-10	2021-11-11	2	23	2	23	21	2
Release	2021-11-10	2021-11-11	3	34	1	17	17	0
Release	2021-11-10	2021-11-11	4	63	0	21	21	0
Release	2021-11-10	2021-11-11	5	113	1	30	30	0
Control	2021-11-10	2021-11-11	6	2	4	NA	NA	NA
Control	2021-11-10	2021-11-11	7	0	0	NA	NA	NA
Control	2021-11-10	2021-11-11	8	4	1	NA	NA	NA
Control	2021-11-10	2021-11-11	9	1	1	NA	NA	NA
Control	2021-11-10	2021-11-11	13	0	5	NA	NA	NA
Control	2021-11-10	2021-11-11	15	3	1	NA	NA	NA
Buffer	2021-11-10	2021-11-11	1	8	6	NA	NA	NA
Buffer	2021-11-10	2021-11-11	11	0	0	NA	NA	NA
Buffer	2021-11-10	2021-11-11	12	0	2	NA	NA	NA
Buffer	2021-11-10	2021-11-11	14	2	2	NA	NA	NA
Buffer	2021-11-10	2021-11-11	10	0	0	NA	NA	NA
Release	2021-11-17	2021-11-18	2	9	0	9	9	0
Release	2021-11-17	2021-11-18	3	6	1	6	6	0
Release	2021-11-17	2021-11-18	4	9	0	9	9	0
Release	2021-11-17	2021-11-18	5	17	2	17	17	0
Control	2021-11-17	2021-11-18	6	2	6	NA	NA	NA
Control	2021-11-17	2021-11-18	7	0	4	NA	NA	NA
Control	2021-11-17	2021-11-18	8	0	0	NA	NA	NA
Control	2021-11-17	2021-11-18	9	0	1	NA	NA	NA
Control	2021-11-17	2021-11-18	13	0	1	NA	NA	NA
Control	2021-11-17	2021-11-18	15	1	0	NA	NA	NA
Buffer	2021-11-17	2021-11-18	1	9	11	NA	NA	NA
Buffer	2021-11-17	2021-11-18	11	1	0	NA	NA	NA
Buffer	2021-11-17	2021-11-18	12	0	0	NA	NA	NA
Buffer	2021-11-17	2021-11-18	14	0	1	NA	NA	NA
Buffer	2021-11-17	2021-11-18	10	0	0	NA	NA	NA
Release	2021-11-24	2021-11-25	2	1	0	1	0	1
Release	2021-11-24	2021-11-25	3	0	1	0	0	0
Release	2021-11-24	2021-11-25	4	2	0	2	2	0
Release	2021-11-24	2021-11-25	5	0	0	0	0	0
Control	2021-11-24	2021-11-25	6	5	9	NA	NA	NA
Control	2021-11-24	2021-11-25	7	0	1	NA	NA	NA
Control	2021-11-24	2021-11-25	8	0	2	NA	NA	NA
Control	2021-11-24	2021-11-25	9	0	3	NA	NA	NA
Control	2021-11-24	2021-11-25	13	1	2	NA	NA	NA
Control	2021-11-24	2021-11-25	15	1	3	NA	NA	NA
Buffer	2021-11-24	2021-11-25	1	1	9	NA	NA	NA
Buffer	2021-11-24	2021-11-25	11	0	1	NA	NA	NA
Buffer	2021-11-24	2021-11-25	12	1	2	NA	NA	NA
Buffer	2021-11-24	2021-11-25	14	2	0	NA	NA	NA
Buffer	2021-11-24	2021-11-25	10	0	0	NA	NA	NA
Release	2021-12-01	2021-12-02	2	33	2	17	16	1
Release	2021-12-01	2021-12-02	3	27	0	27	25	2
Release	2021-12-01	2021-12-02	4	6	2	6	6	0
Release	2021-12-01	2021-12-02	5	9	0	9	9	0
Control	2021-12-01	2021-12-02	6	1	4	NA	NA	NA
Control	2021-12-01	2021-12-02	7	0	1	NA	NA	NA
Control	2021-12-01	2021-12-02	8	0	0	NA	NA	NA
Control	2021-12-01	2021-12-02	9	0	0	NA	NA	NA
Control	2021-12-01	2021-12-02	13	2	3	NA	NA	NA
Control	2021-12-01	2021-12-02	15	2	2	NA	NA	NA
Buffer	2021-12-01	2021-12-02	1	4	5	NA	NA	NA
Buffer	2021-12-01	2021-12-02	11	0	0	NA	NA	NA
Buffer	2021-12-01	2021-12-02	12	0	1	NA	NA	NA
Buffer	2021-12-01	2021-12-02	14	0	0	NA	NA	NA
Buffer	2021-12-01	2021-12-02	10	0	0	NA	NA	NA

## Sheet: HLC
Block	Date	sites	females	males
Buffer	2021-05-05	1	2	3
Buffer	2021-05-05	4	1	0
Buffer	2021-05-05	5	1	0
Buffer	2021-05-05	11	2	0
Control	2021-05-05	6	3	6
Control	2021-05-05	7	4	2
Control	2021-05-05	8	2	1
Control	2021-05-05	9	0	1
Control	2021-05-05	10	2	0
Control	2021-05-05	12	1	0
Release	2021-05-05	2	5	2
Release	2021-05-05	3	2	0
Buffer	2021-06-24	1	19	60
Buffer	2021-06-24	4	1	7
Buffer	2021-06-24	5	8	4
Buffer	2021-06-24	11	0	0
Control	2021-06-24	6	31	24
Control	2021-06-24	7	14	20
Control	2021-06-24	8	32	12
Control	2021-06-24	9	23	44
Control	2021-06-24	10	4	0
Control	2021-06-24	12	0	0
Release	2021-06-24	2	13	11
Release	2021-06-24	3	11	13
Buffer	2021-07-16	1	2	6
Buffer	2021-07-16	4	3	3
Buffer	2021-07-16	5	11	15
Buffer	2021-07-16	11	1	0
Control	2021-07-16	6	3	5
Control	2021-07-16	7	7	3
Control	2021-07-16	8	3	0
Control	2021-07-16	9	2	5
Control	2021-07-16	10	7	3
Control	2021-07-16	12	2	0
Release	2021-07-16	2	4	3
Release	2021-07-16	3	16	9
Buffer	2021-08-12	1	41	50
Buffer	2021-08-12	4	2	2
Buffer	2021-08-12	5	5	3
Buffer	2021-08-12	11	4	8
Control	2021-08-12	6	7	3
Control	2021-08-12	7	8	7
Control	2021-08-12	8	1	1
Control	2021-08-12	9	6	10
Control	2021-08-12	10	1	5
Control	2021-08-12	12	4	2
Release	2021-08-12	2	2	4
Release	2021-08-12	3	4	4
Buffer	2021-11-03	1	7	74
Buffer	2021-11-03	4	1	3
Buffer	2021-11-03	5	2	0
Buffer	2021-11-03	11	2	0
Control	2021-11-03	6	2	5
Control	2021-11-03	7	6	7
Control	2021-11-03	8	3	1
Control	2021-11-03	9	3	0
Control	2021-11-03	10	2	4
Control	2021-11-03	12	1	0
Release	2021-11-03	2	1	13
Release	2021-11-03	3	0	89
Buffer	2021-11-04	1	6	36
Buffer	2021-11-04	4	2	13
Buffer	2021-11-04	5	8	1
Buffer	2021-11-04	11	2	8
Control	2021-11-04	6	2	0
Control	2021-11-04	7	2	0
Control	2021-11-04	8	3	4
Control	2021-11-04	9	3	0
Control	2021-11-04	10	5	1
Control	2021-11-04	12	3	3
Release	2021-11-04	2	1	20
Release	2021-11-04	3	0	19
Buffer	2021-11-06	1	6	27
Buffer	2021-11-06	4	1	1
Buffer	2021-11-06	5	1	1
Buffer	2021-11-06	11	2	1
Control	2021-11-06	6	2	4
Control	2021-11-06	7	5	9
Control	2021-11-06	8	1	2
Control	2021-11-06	9	1	1
Control	2021-11-06	10	2	2
Control	2021-11-06	12	3	2
Release	2021-11-06	2	0	76
Release	2021-11-06	3	1	87
